# Supplementary material for: Insufficient uptake of systematic search methods in oncological clinical practice guideline: a systematic review
Source: BMC Med Res Methodol. 2019 Aug 20;19:180. doi: 10.1186/s12874-019-0818-5 (PMC6702747; doi:10.1186/s12874-019-0818-5)
Supplement: Supplementary file 2 — Guidance documents list. List and classification of all the included Guidance Documents. (XLSX 83 kb) [file 12874_2019_818_MOESM2_ESM.xlsx]

## Sheet: GD list
	Additional File 2:	Guidance Documents list. List and classification of all the included Guidance Documents
	Abbreviations used for the Guidance Documents classification:	noLA: no reference to any type of literature analysis; noSR: literature analysis described, but not as systematic; SRnoDT: use of systematic search described, but no details provided; SRinsDT: described systematic search methods did not meet our quality criteria; SR: systematic search methods meeting our quality criteria.
ID	Title	Organization acronim	Organization name	Year of validity	Type of organization	Continent	Nation	Nation income (2017)	Scope (broad VS focused)	Neoplasm	Guidance Document classification
1	ACR Appropriateness Criteria® radiologic management of benign and malignant biliary obstruction.	ACR	American College of Radiology	2012	Professional/specialist Society	North America	USA	H - High income	focused	biliary cancer	SRinsDT
2	Cancers of the Biliary Tree and Gallbladder	AHS	Alberta Health Services	2013	Government Agency	North America	Canada	H - High income	broad	biliary cancer	SRinsDT
3	The role of endoscopy in the evaluation and treatment of patients with biliary neoplasia.	ASGE	American Society for Gastrointestinal Endoscopy	2013	Professional/specialist Society	North America	USA	H - High income	focused	biliary cancer	noSR
4	Biliary cancer: ESMO Clinical Practice Guidelines for diagnosis, treatment and follow-up	ESMO	European Society of Medical Oncology	2011	Professional/specialist Society	Europe	Europe	H - High income	broad	biliary cancer	noSR
5	Clinical practice guidelines for the management of biliary tract cancers 2015: the 2nd English edition.	JSHBPS	Japanese Society of Hepato-Biliary-Pancreatic Surgery	2015	Professional/specialist Society	Asia	Japan	H - High income	broad	biliary cancer	SRnoDT
6	Practical guidelines for the surgical treatment of gallbladder cancer.	KAHBPS	Korean Association of Hepato-Biliary and Pancreas Surgery	2014	Professional/specialist Society	Asia	South Korea	H - High income	focused	biliary cancer	SRnoDT
7	Diagnosis and management of primary sclerosing cholangitis.	AASLD	American Association for the Study of Liver Diseases	2010	other	North America	USA	H - High income	focused	biliary cancer	SRnoDT
8	Asia-Pacific consensus recommendations for endoscopic and interventional management of hilar cholangiocarcinoma	APWP	Asia-Paciﬁc Working Party	2013	Independent Expert Panel	Asia	Asia (Australia, India, Japan, Korea, Malaysia, Singapore, Thailand)	H; UM; LM	focused	biliary cancer	SRinsDT
9	Guidelines for the diagnosis and treatment of cholangiocarcinoma: an update	BSG	British Society of Gastroenterology	2012	Professional/specialist Society	Europe	UK	H - High income	broad	biliary cancer	SRnoDT
10	Diagnosis and treatment of cholangiocarcinoma: a consensus from surgical specialists of China.	CMA	Chinese Medical Association	2014	Professional/specialist Society	Asia	China	UM - Upper middle income	broad	biliary cancer	noLA
11	Guidelines for the diagnosis and management of intrahepatic cholangiocarcinoma.	ILCA	International Liver Cancer Association	2014	Professional/specialist Society	international	international (Europe, USA, Rep.Korea)	H - High income	broad	biliary cancer	SRnoDT
12	Cholangiocarcinoma: A position paper by the Italian Society of Gastroenterology (SIGE), the Italian Association of Hospital Gastroenterology (AIGO), the Italian Association of Medical Oncology (AIOM) and the Italian Association of Oncological Radiotherapy (AIRO)	SIGE-AIGO-AIOM-AIRO	Italian Society of Gastroenterology - Italian Association of Hospital Gastroenterology - Italian Association of Medical Oncology - Italian Association of Oncological Radiotherapy	2010	Professional/specialist Society	Europe	Italy	H - High income	broad	biliary cancer	SRnoDT
13	Bladdercarcinoma. Nation-wide guideline	ACCC	Association of Comprehensive Cancer Centres (IKNL Integraal Kankercentrum Nederland)	2009	Professional/specialist Society	Europe	Netherlands	H - High income	broad	bladder cancer	SRnoDT
14	ACR Appropriateness Criteria® post-treatment surveillance of bladder cancer.	ACR	American College of Radiology	2014	Professional/specialist Society	North America	USA	H - High income	focused	bladder cancer	SRinsDT
15	ACR Appropriateness Criteria® pretreatment staging of invasive bladder cancer.	ACR	American College of Radiology	2012	Professional/specialist Society	North America	USA	H - High income	focused	bladder cancer	SRinsDT
16	Non-Muscle Invasive Bladder Cancer	AHS	Alberta Health Services	2013	Government Agency	North America	Canada	H - High income	focused	bladder cancer	SR
17	Muscle invasive and locally advanced/metastatic bladder cancer.	AHS	Alberta Health Services	2013	Government Agency	North America	Canada	H - High income	broad	bladder cancer	SR
18	Carcinoma della vescica	AIOM	Associazione Italiana di Oncologia Medica	2014	Professional/specialist Society	Europe	Italy	H - High income	broad	bladder cancer	noSR
19	Guideline for the management of nonmuscle invasive bladder cancer: (stages Ta,T1, and Tis): 2007 update.	AUA	American Urological Association	2013	Professional/specialist Society	North America	USA	H - High income	focused	bladder cancer	SRinsDT
20	New Italian guidelines on bladder cancer, based on the World Health Organization 2004 classification	AURO	Associazione UROlogi italiani	2010	Professional/specialist Society	Europe	Italy	H - High income	broad	bladder cancer	SRinsDT
21	Management of small cell carcinoma of the bladder: Consensus guidelines from the Canadian Association of Genitourinary Medical Oncologists (CAGMO)	CAGMO	Canadian Association of Genitourinary Medical Oncologists	2013	Professional/specialist Society	North America	Canada	H - High income	broad	bladder cancer	SR
22	Guidelines on non-muscle-invasive bladder cancer (TaT1 and CIS).	EAU	European Association of Urology	2015	Professional/specialist Society	Europe	Europe	H - High income	broad	bladder cancer	SRinsDT
23	Bladder cancer: ESMO Practice Guidelines for diagnosis, treatment and follow-up.	ESMO	European Society of Medical Oncology	2015	Professional/specialist Society	Europe	Europe	H - High income	broad	bladder cancer	noSR
24	bladder cancer	ICUD	International Consultation on Urological Diseases	2012	other	international	international (Europe, North America, Cina, Egypt, India, Japan, Singapore)	H; UM; LM	broad	bladder cancer	SRnoDT
25	Evidence-based clinical practice guidelines for bladder cancer (summary - JUA 2009 Edition)	JUA	Japanese Urological Association	2010	Professional/specialist Society	Asia	Japan	H - High income	broad	bladder cancer	SRinsDT
26	Bladder cancer, version 2.2015	NCCN	National Comprehensive Cancer Network	2015	Professional/specialist Society	North America	USA	H - High income	broad	bladder cancer	noLA
27	Bladder cancer: diagnosis and management	NICE	National Institute for Health and Care Excellence (National Collaborating Centre for Cancer)	2015	Government Agency	Europe	UK	H - High income	broad	bladder cancer	SR
28	SEOM clinical guidelines for the treatment of invasive bladder cancer	SEOM	Sociedad Española de Oncología Médica (Spanish Society of Medical Oncology)	2011	Professional/specialist Society	Europe	Spain	H - High income	focused	bladder cancer	noLA
29	Treatment of Non Muscle Invasive Bladder Tumor Related to the Problem of Bacillus Calmette-Guerin Availability. Consensus of a Spanish Expert's Panel	sep	spanish expert panel	2013	Independent Expert Panel	Europe	Spain	H - High income	focused	bladder cancer	noSR
30	Saudi oncology society and Saudi urology association combined clinical management guidelines for urothelial urinary bladder cancer.	SOS-SUA	Saudi Oncology Society - Saudi Urology Association	2014	Professional/specialist Society	Asia	Saudi	H - High income	broad	bladder cancer	noLA
31	Saudi Oncology Society clinical management guidelines for urinary bladder cancer	SOS	Saudi Oncology Society	2011	Professional/specialist Society	Asia	Saudi	H - High income	broad	bladder cancer	noLA
32	Guidelines on muscle-invasive and metastatic bladder cancer	EAU	European Association of Urology	2015	Professional/specialist Society	Europe	Europe	H - High income	broad	bladder cancer	SR
33	Canadian guidelines for postoperative surveillance of upper urinary tract urothelial carcinoma.	CUA	Canadian Urological Association	2013	Professional/specialist Society	North America	Canada	H - High income	focused	bladder cancer	SR
34	Upper tract urothelial tumours.	AHS	Alberta Health Services	2013	Government Agency	North America	Canada	H - High income	broad	bladder cancer	SR
35	Guidelines on urothelial carcinomas of the upper urinary tract	EAU	European Association of Urology	2015	Professional/specialist Society	Europe	Europe	H - High income	broad	bladder cancer	SRinsDT
36	Recommendations for the optimal management of early and advanced urothelial carcinoma	cep	consensus expert panel	2012	Independent Expert Panel	Europe	Spain	H - High income	broad	bladder cancer	noSR
37	Evidenced-based clinical practice guideline for upper tract urothelial carcinoma (summary--Japanese Urological Association, 2014 edition).	JUA	Japanese Urological Association	2015	Professional/specialist Society	Asia	Japan	H - High income	broad	bladder cancer	SRinsDT
38	Diagnosis and classification of flat, papillary, and invasive urothelial carcinoma: the WHO/ISUP consensus	WHO-ISUP	World Health Organization - International Society of Urologic Pathology	2010	other	international	international (Europe, North America, Argentina, Japan, Australia)	H - High income	focused	bladder cancer	noLA
39	Guidelines on Primary Urethral Carcinoma	EAU	European Association of Urology	2015	Professional/specialist Society	Europe	Europe	H - High income	broad	bladder cancer	SRinsDT
40	DEGRO practical guidelines for radiotherapy of breast cancer V : Therapy for locally advanced and inflammatory breast cancer, as well as local therapy in cases with synchronous distant metastases.	DEGRO	Deutschen Gesellschaft für Radioonkologie (Breast Cancer Expert Panel of the German Society of Radiation Oncology)	2015	Professional/specialist Society	Europe	Germany	H - High income	focused	breast cancer	SRinsDT
41	Meeting highlights: the first korean breast cancer treatment consensus conference.	KBCS	Korean Breast Cancer Society	2014	Professional/specialist Society	Asia	Rep.Korea	H - High income	focused	breast cancer	noLA
42	Maastricht Delphi consensus on event definitions for classification of recurrence in breast cancer research.	mep	multidisciplinary expert panel	2014	Independent Expert Panel	international	international (Europe, USA, Australia, NewZealand)	H - High income	focused	breast cancer	noSR
43	Clinical practice guideline for dedicated breast PET.	JSNM	Japanese Society of Nuclear Medicine	2014	Professional/specialist Society	Asia	Japan	H - High income	focused	breast cancer	noLA
44	Interdisciplinary GoR level III Guidelines for the Diagnosis, Therapy and Follow-up Care of Breast Cancer: Short version - AWMF Registry No.: 032-045OL AWMF-Register-Nummer: 032-045OL - Kurzversion 3.0, Juli 2012.	S3	German S3	2013	Professional/specialist Society		Germany	H - High income	broad	breast cancer	noLA
45	Breast Cancer. Nation-wide guideline, Version: 2.0	ACCC	Association of Comprehensive Cancer Centres (Nationaal Borstkanker Overleg Nederland)	2012	Professional/specialist Society	Europe	Netherlands	H - High income	broad	breast cancer	SRnoDT
46	Management of gynecologic issues in women with breast cancer.	ACOG	American College of Obstetricians and Gynecologists	2012	Professional/specialist Society	North America	USA	H - High income	focused	breast cancer	SRinsDT
47	ACR Appropriateness Criteria® stage I breast cancer: initial workup and surveillance for local recurrence and distant metastases in asymptomatic women.	ACR	American College of Radiology	2014	Professional/specialist Society	North America	USA	H - High income	focused	breast cancer	SRinsDT
48	ACR Appropriateness Criteria® local-regional recurrence (LRR) and salvage surgery—breast cancer.	ACR	American College of Radiology	2013	Professional/specialist Society	North America	USA	H - High income	focused	breast cancer	SRinsDT
49	ACR Appropriateness Criteria® locally advanced breast cancer.	ACR	American College of Radiology	2011	Professional/specialist Society	North America	USA	H - High income	focused	breast cancer	SRinsDT
50	ACR Appropriateness Criteria® evaluation of the symptomatic male breast.	ACR	American College of Radiology	2014	Professional/specialist Society	North America	USA	H - High income	focused	breast cancer	SR
51	ACR Appropriateness Criteria® palpable breast masses.	ACR	American College of Radiology	2012	Professional/specialist Society	North America	USA	H - High income	focused	breast cancer	SRinsDT
52	AGO Recommendations for the Diagnosis and Treatment of Patients with Early Breast Cancer: Update 2014.	AGO	Arbeitsgemeinschaft Gynäkologische Onkologie (German Gynecological Oncology Group)	2014	Professional/specialist Society	Europe	Germany	H - High income	focused	breast cancer	noLA
53	AGO Recommendations for the Diagnosis and Treatment of Patients with Advanced and Metastatic Breast Cancer: Update 2014.	AGO	Arbeitsgemeinschaft Gynäkologische Onkologie (German Gynecological Oncology Group)	2014	Professional/specialist Society	Europe	Germany	H - High income	focused	breast cancer	noLA
54	Follow-up care for early-stage breast cancer.	AHS	Alberta Health Services	2013	Government Agency	North America	Canada	H - High income	focused	breast cancer	SR
55	Staging investigations for asymptomatic and newly diagnosed breast cancer.	AHS	Alberta Health Services	2012	Government Agency	North America	Canada	H - High income	focused	breast cancer	SR
56	Neoplasie della mammella	AIOM	Associazione Italiana di Oncologia Medica	2015	Professional/specialist Society	Europe	Italy	H - High income	broad	breast cancer	noSR
57	Breast cancer follow-up and management after primary treatment: American Society of Clinical Oncology clinical practice guideline update.	ASCO	American Society of Clinical Oncology	2012	Professional/specialist Society	North America	USA	H - High income	focused	breast cancer	SR
58	Adjuvant endocrine therapy for women with hormone receptor-positive breast cancer: american society of clinical oncology clinical practice guideline focused update.	ASCO	American Society of Clinical Oncology	2014	Professional/specialist Society	North America	USA	H - High income	focused	breast cancer	SR
59	Use of Biomarkers to Guide Decisions on Systemic Therapy for Women With Metastatic Breast Cancer: American Society of Clinical Oncology Clinical Practice Guideline	ASCO	American Society of Clinical Oncology	2015	Professional/specialist Society	North America	USA	H - High income	focused	breast cancer	SR
60	Locoregional therapy of locally advanced breast cancer: a clinical practice guideline.	CCO	Cancer Care Ontario	2014	Government Agency	North America	Canada	H - High income	focused	breast cancer	SR
61	Optimal systemic therapy for early breast cancer in women: a clinical practice guideline.	CCO	Cancer Care Ontario	2014	Government Agency	North America	Canada	H - High income	focused	breast cancer	SR
62	A Canadian national expert consensus on neoadjuvant therapy for breast cancer: linking practice to evidence and beyond.	CLABCN	Canadian Locally Advanced Breast Cancer National Consensus Group	2015	Independent Expert Panel	North America	Canada	H - High income	focused	breast cancer	SRinsDT
63	Primary breast cancer: ESMO Clinical Practice Guidelines for diagnosis, treatment and follow-up	ESMO	European Society of Medical Oncology	2013	Professional/specialist Society	Europe	Europe	H - High income	broad	breast cancer	noSR
64	First international consensus guidelines for breast cancer in young women (BCY1).	EUSOMA	European Society of Breast Cancer Specialists	2014	Professional/specialist Society	Europe	Europe	H - High income	focused	breast cancer	noLA
65	Breast Cancer OncoGuia	OGG	OncoGuia Group	2010	Government Agency	Europe	Spain	H - High income	broad	breast cancer	noLA
66	Special report: Consensus conference III. Image-detected breast cancer: state-of-the-art diagnosis and treatment	icp	interdisciplinary consensus panel	2009	Independent Expert Panel	North America	USA	H - High income	focused	breast cancer	noSR
67	Diagnosis of breast disease.	ICSI	Institute for Clinical Systems Improvement	2012	other	North America	USA	H - High income	focused	breast cancer	noLA
68	Recommendations from an international consensus conference on the current status and future of neoadjuvant systemic therapy in primary breast cancer	iep	international expert panel	2012	Independent Expert Panel	international	international (Europe, USA)	H - High income	focused	breast cancer	SRinsDT
69	International expert panel on inflammatory breast cancer: consensus statement for standardized diagnosis and treatment	iep	international expert panel	2011	Independent Expert Panel	international	international (Europe, USA, Emirates)	H - High income	focused	breast cancer	SRnoDT
70	The Japanese Breast Cancer Society Clinical Practice Guideline for systemic treatment of breast cancer.	JBCS	Japanese Breast Cancer Society	2015	Professional/specialist Society	Asia	Japan	H - High income	focused	breast cancer	noLA
71	NCCN clinical practice guidelines in oncology: breast cancer screening and diagnosis, version 1.2015	NCCN	National Comprehensive Cancer Network	2015	Professional/specialist Society	North America	USA	H - High income	focused	breast cancer	noLA
72	Breast cancer, version 1.2016	NCCN	National Comprehensive Cancer Network	2015	Professional/specialist Society	North America	USA	H - High income	broad	breast cancer	noLA
73	Recommendations for follow-up of women with early breast cancer	NHMRC (NBOCC-CA)	National Health and Medical Research Council (National Breast and Ovarian Cancer Centre-Cancer Australia)	2010	Government Agency	Oceania	Australia	H - High income	focused	breast cancer	SR
74	Early and locally advanced breast cancer. Diagnosis and treatment.	NICE	National Institute for Health and Care Excellence (National Collaborating Centre for Cancer)	2012	Government Agency	Europe	UK	H - High income	broad	breast cancer	SR
75	Advanced breast cancer. Diagnosis and treatment.	NICE	National Institute for Health and Care Excellence (National Collaborating Centre for Cancer)	2014	Government Agency	Europe	UK	H - High income	broad	breast cancer	SR
76	Management of early breast cancer	NZGG	New Zealand Guidelines Group	2009	other	Oceania	New Zealand	H - High income	focused	breast cancer	SRnoDT
77	SEOM clinical guidelines for the systemic treatment of early breast cancer 2013.	SEOM	Sociedad Española de Oncología Médica (Spanish Society of Medical Oncology)	2013	Professional/specialist Society	Europe	Spain	H - High income	focused	breast cancer	noLA
78	Treatment of primary breast cancer. A national clinical guideline.	SIGN	Scottish Intercollegiate Guidelines Network	2013	Government Agency	Europe	UK	H - High income	focused	breast cancer	SR
79	Management of elderly patients with breast cancer: updated recommendations of the International Society of Geriatric Oncology (SIOG) and European Society of Breast Cancer Specialists (EUSOMA)	SIOG-EUSOMA	Société Internationale d’Oncologie Gériatrique (International Society of Geriatric Oncology) - European Society of Breast Cancer Specialists	2012	Professional/specialist Society	Europe	Europe	H - High income	focused	breast cancer	SR
80	Tailoring therapies - improving the management of early breast cancer: St Gallen International Expert Consensus on the Primary Therapy of Early Breast Cancer 2015.	SONK	St.Gallen Oncology Conferences	2015	other	Europe	Europe	H - High income	focused	breast cancer	noLA
81	Systemic therapy for patients with advanced human epidermal growth factor receptor 2-positive breast cancer: American Society of Clinical Oncology clinical practice guideline.	ASCO	American Society of Clinical Oncology	2014	Professional/specialist Society	North America	USA	H - High income	focused	breast cancer	SR
82	Third consensus on medical treatment of metastatic breast cancer	CECOG	Central European Cooperative Oncology Group	2009	Professional/specialist Society	Europe	Europe	H - High income	focused	breast cancer	SR
83	ESO-ESMO 2nd international consensus guidelines for advanced breast cancer (ABC2)	ESO-ESMO (ABC2)	European School of Oncology - European Society of Medical Oncology	2014	Professional/specialist Society	international	international (Europe, North America, Australia, Israel, Lebanon, South Africa, China)	H; UM	focused	breast cancer	noSR
84	SEOM clinical guidelines for the management of metastatic breast cancer 2013.	SEOM	Sociedad Española de Oncología Médica (Spanish Society of Medical Oncology)	2013	Professional/specialist Society	Europe	Spain	H - High income	focused	breast cancer	noLA
85	American Brachytherapy Society consensus guidelines for locally advanced carcinoma of the cervix. Part II: high-dose-rate brachytherapy	ABS	American Brachytherapy Society	2012	Professional/specialist Society	North America	USA	H - High income	focused	cervical cancer	noSR
86	ACR Appropriateness Criteria® pretreatment planning of invasive cancer of the cervix.	ACR	American College of Radiology	2012	Professional/specialist Society	North America	USA	H - High income	focused	cervical cancer	SRinsDT
87	ACR Appropriateness Criteria definitive therapy for early stage cervical cancer.	ACR	American College of Radiology	2012	Professional/specialist Society	North America	USA	H - High income	focused	cervical cancer	SRinsDT
88	ACR Appropriateness Criteria advanced cervical cancer.	ACR	American College of Radiology	2011	Professional/specialist Society	North America	USA	H - High income	focused	cervical cancer	SRinsDT
89	Interdisciplinary S2k guideline on the diagnosis and treatment of cervical carcinoma	AGO-DGGG-DKG	Arbeitsgemeinschaft Gynäkologische Onkologie (German Gynecological Oncology Group) - Deutsche Gesellschaft für Gynäkologie und Geburtshilfe (German Society for Gynecology and Obstetrics) - Deutsche Krebsgesellschaft (German Cancer Society)	2009	Professional/specialist Society	Europe	Germany	H - High income	broad	cervical cancer	noSR
90	Cancer of the uterine cervix.	AHS	Alberta Health Services	2013	Government Agency	North America	Canada	H - High income	broad	cervical cancer	SR
91	Follow-up for Women after Treatment for Cervical Cancer	CCO	Cancer Care Ontario	2015	Government Agency	North America	Canada	H - High income	focused	cervical cancer	SR
92	Systemic Therapy for Recurrent, Metastatic, or Persistent Cervical Cancer	CCO	Cancer Care Ontario	2014	Government Agency	North America	Canada	H - High income	focused	cervical cancer	SR
93	PET imaging in cervical cancer: recommendations.	CCO	Cancer Care Ontario	2009	Government Agency	North America	Canada	H - High income	focused	cervical cancer	SR
94	Cervical cancer: ESMO Clinical Practice Guidelines for diagnosis, treatment and follow-up	ESMO	European Society of Medical Oncology	2012	Professional/specialist Society	Europe	Europe	H - High income	broad	cervical cancer	noSR
95	Staging of uterine cervical cancer with MRI: guidelines of the European Society of Urogenital Radiology	ESUR	European Society of Urogenital Radiology	2011	Professional/specialist Society	Europe	Europe	H - High income	focused	cervical cancer	noLA
96	Japan Society of Gynecologic Oncology guidelines 2011 for the treatment of uterine cervical cancer.	JSGO	Japan Society of Gynecologic Oncology	2015	Professional/specialist Society	Asia	Japan	H - High income	focused	cervical cancer	SRnoDT
97	Cervical cancer, version 2.2015	NCCN	National Comprehensive Cancer Network	2015	Professional/specialist Society	North America	USA	H - High income	broad	cervical cancer	noLA
98	Cervical cancer state-of-the-clinical-science meeting on pretreatment evaluation and prognostic factors, September 27-28, 2007: proceedings and recommendations	NCI-GCIG-ACR-ASTRO	National Cancer Institute - Gynecologic Cancer Intergroup - American College of Radiology - American Society for Radiation Oncology	2009	other	North America	USA	H - High income	focused	cervical cancer	noLA
99	SEOM guidelines for cervical cancer	SEOM	Sociedad Española de Oncología Médica (Spanish Society of Medical Oncology)	2012	Professional/specialist Society	Europe	Spain	H - High income	broad	cervical cancer	noLA
100	Squamous cell carcinoma of the vulva.	AHS	Alberta Health Services	2013	Government Agency	North America	Canada	H - High income	broad	cervical cancer	SR
101	ACR Appropriateness Criteria® management of vaginal cancer.	ACR	American College of Radiology	2013	Professional/specialist Society	North America	USA	H - High income	broad	cervical cancer	SRinsDT
102	Early Stage Colon Cancer	AHS	Alberta Health Services	2013	Government Agency	North America	Canada	H - High income	focused	colorectal cancer	SRinsDT
103	Practice parameters for the management of colon cancer.	ASCRS	American Society of Colon and Rectal Surgeons	2012	Professional/specialist Society	North America	USA	H - High income	broad	colorectal cancer	SR
104	Adjuvant systemic chemotherapy for Stage II and III colon cancer after complete resection: an updated practice guideline	CCO	Cancer Care Ontario	2015	Government Agency	North America	Canada	H - High income	focused	colorectal cancer	SR
105	Early colon cancer: ESMO Clinical Practice Guidelines for diagnosis, treatment and follow-up.	ESMO	European Society of Medical Oncology	2013	Professional/specialist Society	Europe	Europe	H - High income	broad	colorectal cancer	noSR
106	Colon cancer, version 2.2015.	NCCN	National Comprehensive Cancer Network	2015	Professional/specialist Society	North America	USA	H - High income	broad	colorectal cancer	noLA
107	Recommendations and expert opinion on the adjuvant treatment of colon cancer in Spain	sep	spanish expert panel	2011	Independent Expert Panel	Europe	Spain	H - High income	focused	colorectal cancer	noSR
108	ACR Appropriateness Criteria pretreatment staging of colorectal cancer.	ACR	American College of Radiology	2011	Professional/specialist Society	North America	USA	H - High income	focused	colorectal cancer	SRinsDT
109	AGA medical position statement on the diagnosis and management of colorectal neoplasia in inflammatory bowel disease.	AGA	American Gastroenterological Association	2010	Professional/specialist Society	North America	USA	H - High income	focused	colorectal cancer	SR
110	Early Stage Colorectal Cancer Surveillance	AHS	Alberta Health Services	2014	Government Agency	North America	Canada	H - High income	focused	colorectal cancer	SRinsDT
111	Tumori del colon retto	AIOM	Associazione Italiana di Oncologia Medica	2015	Professional/specialist Society	Europe	Italy	H - High income	broad	colorectal cancer	noSR
112	Follow-up care, surveillance protocol, and secondary prevention measures for survivors of colorectal cancer: American Society of Clinical Oncology clinical practice guideline endorsement	ASCO(CCO)	American Society of Clinical Oncology / CancerCare Ontario	2013	Professional/specialist Society	North America	USA	H - High income	focused	colorectal cancer	SR
113	Role of endoscopy in the staging and management of colorectal cancer.	ASGE	American Society for Gastrointestinal Endoscopy	2013	Professional/specialist Society	North America	USA	H - High income	focused	colorectal cancer	noSR
114	Colorectal cancer surveillance after index colonoscopy: guidance from the Canadian Association of Gastroenterology	CAG	Canadian Association of Gastroenterology	2013	Professional/specialist Society	North America	Canada	H - High income	focused	colorectal cancer	SRinsDT
115	Guideline for referral of patients with suspected colorectal cancer by family physicians and other primary care providers.	CCO	Cancer Care Ontario	2014	Government Agency	North America	Canada	H - High income	focused	colorectal cancer	SR
116	Follow-up Care, Surveillance Protocol, and Secondary Prevention Measures for Survivors of Colorectal Cancer	CCO	Cancer Care Ontario	2012	Government Agency	North America	Canada	H - High income	focused	colorectal cancer	SR
117	PET imaging in colorectal cancer: recommendations.	CCO	Cancer Care Ontario	2010	Government Agency	North America	Canada	H - High income	focused	colorectal cancer	SR
118	ESMO Consensus Guidelines for management of patients with colon and rectal cancer. a personalized approach to clinical decision making	ESMO	European Society of Medical Oncology	2012	Professional/specialist Society	Europe	Europe	H - High income	broad	colorectal cancer	noSR
119	EURECCA colorectal: multidisciplinary management: European consensus conference colon & rectum.	EURECCA	EUropean REgistry of Cancer CAre	2014	Professional/specialist Society	Europe	Europe	H - High income	broad	colorectal cancer	noSR
120	Colorectal Cancer OncoGuia	OGG	OncoGuia Group	2010	Government Agency	Europe	Spain	H - High income	broad	colorectal cancer	noLA
121	Indian Council of Medical Research consensus document for the management of colorectal cancer.	ICMR	Indian Council of Medical Research	2014	Government Agency	Asia	India	LM - Lower middle income	broad	colorectal cancer	noSR
122	Serrated lesions of the colorectum: review and recommendations from an expert panel	iep	international expert panel	2012	Independent Expert Panel	international	international (North America, New Zealand)	H - High income	focused	colorectal cancer	SRinsDT
123	Japanese Society for Cancer of the Colon and Rectum (JSCCR) Guidelines 2014 for treatment of colorectal cancer.	JSCCR	Japanese Society for Cancer of the Colon and Rectum	2015	Professional/specialist Society	Asia	Japan	H - High income	focused	colorectal cancer	SRinsDT
124	Follow-up of colorectal polyps or cancer.	MSC	Medical Services Commission, British Columbia	2013	Government Agency	North America	Canada	H - High income	focused	colorectal cancer	noSR
125	UK fifth National Colorectal Cancer Consensus Meeting 2010	NCCC	National Colorectal Cancer Consensus	2012	Independent Expert Panel	Europe	UK	H - High income	focused	colorectal cancer	noLA
126	Colorectal cancer. The diagnosis and management of colorectal cancer.	NICE	National Institute for Health and Care Excellence (National Collaborating Centre for Cancer)	2014	Government Agency	Europe	UK	H - High income	broad	colorectal cancer	SR
127	Management of early colorectal cancer	NZGG	New Zealand Guidelines Group	2011	other	Oceania	New Zealand	H - High income	focused	colorectal cancer	SRinsDT
128	SEOM clinical guidelines for the adjuvant treatment of colorectal cancer 2013.	SEOM	Sociedad Española de Oncología Médica (Spanish Society of Medical Oncology)	2013	Professional/specialist Society	Europe	Spain	H - High income	focused	colorectal cancer	noLA
129	Guidelines for biomarker testing in colorectal carcinoma (CRC): a national consensus of the Spanish Society of Pathology (SEAP) and the Spanish Society of Medical Oncology (SEOM)	SEOM-SEAP	Sociedad Española de Oncología Médica (Spanish Society of Medical Oncology) - Spanish Society of Pathology	2012	Professional/specialist Society	Europe	Spain	H - High income	focused	colorectal cancer	noLA
130	Diagnosis and management of colorectal cancer. A national clinical guideline.	SIGN	Scottish Intercollegiate Guidelines Network	2011	Government Agency	Europe	UK	H - High income	broad	colorectal cancer	SR
131	Treatment of colorectal cancer in older patients: International Society of Geriatric Oncology (SIOG) consensus recommendations 2013.	SIOG	Société Internationale d’Oncologie Gériatrique (International Society of Geriatric Oncology)	2015	Professional/specialist Society	international	international (Europe, USA)	H - High income	focused	colorectal cancer	noLA
132	Saudi Oncology Society clinical management guideline series. Colorectal cancer 2014.	SOS	Saudi Oncology Society	2014	Professional/specialist Society	Asia	Saudi	H - High income	broad	colorectal cancer	noLA
133	Adaptation of international guidelines for metastatic colorectal cancer: an asian consensus.	mep	multidisciplinary expert panel	2014	Independent Expert Panel	Asia	Asia (Europe, USA, China, Hong Kong, India, Indonesia, Malaysia, Philippines, Singapore, South Korea, Taiwan, Thailand)	H; UM; LM	focused	colorectal cancer	noSR
134	Metastatic Colorectal Cancer	AHS	Alberta Health Services	2014	Government Agency	North America	Canada	H - High income	focused	colorectal cancer	SRinsDT
135	Metastatic colorectal cancer: ESMO Clinical Practice Guidelines for diagnosis, treatment and follow-up.	ESMO	European Society of Medical Oncology	2014	Professional/specialist Society	Europe	Europe	H - High income	broad	colorectal cancer	noSR
136	SEOM clinical guidelines for the treatment of advanced colorectal cancer 2013.	SEOM	Sociedad Española de Oncología Médica (Spanish Society of Medical Oncology)	2013	Professional/specialist Society	Europe	Spain	H - High income	focused	colorectal cancer	noLA
137	Locoregional surgical and interventional therapies for advanced colorectal cancer liver metastases: expert consensus statements	AHPBA-SSO-SSAT	Americas HepatoPancreato-Biliary Association - Society of Surgical Oncology - Society for Surgery of the Alimentary Tract	2013	Professional/specialist Society	North America	USA	H - High income	focused	colorectal cancer	noLA
138	Chinese guidelines for the diagnosis and comprehensive treatment of hepatic metastasis of colorectal cancer	CMH	Chinese Ministry of Health	2011	Government Agency	Asia	China	UM - Upper middle income	focused	colorectal cancer	noLA
139	The oncosurgery approach to managing liver metastases from colorectal cancer: a multidisciplinary international consensus	EGOSLIM	Expert Group on OncoSurgery management of LIver Metastases	2012	Independent Expert Panel	international	international (Europe, USA, Japan, Philippines)	H; L	focused	colorectal cancer	SRnoDT
140	Management of patients with synchronous liver metastases of colorectal cancer. Clinical practice guidelines. Guidelines of the French society of gastrointestinal surgery (SFCD) and of the association of hepatobiliary surgery and liver transplantation (ACHBT). Short version	SFCD-ACHBT	Société Française de Chirurgie Digestive (French Society of Gastrointestinal Surgery) - Association of Hepatobiliary Surgery and Liver Transplantation (Association de Chirurgie HépatoBiliaire et de Transplantation hépatique)	2011	Professional/specialist Society	Europe	France	H - High income	focused	colorectal cancer	noLA
141	The role of liver resection in colorectal cancer metastases.	CCO	Cancer Care Ontario	2012	Government Agency	North America	Canada	H - High income	focused	colorectal cancer	SR
142	Combination of surgery and chemotherapy and the role of targeted agents in the treatment of patients with colorectal liver metastases: recommendations from an expert panel	ECMTG	European Colorectal Metastases Treatment Group	2009	Independent Expert Panel	Europe	Europe	H - High income	focused	colorectal cancer	noLA
143	Consensus statement on the multidisciplinary management of patients with recurrent and primary rectal cancer beyond total mesorectal excision planes.	BTMEG	Beyond TME Group	2013	Independent Expert Panel	international	international (Europe, North America, Hong Kong)	H - High income	focused	colorectal cancer	noLA
144	ACR Appropriateness Criteria resectable rectal cancer.	ACR	American College of Radiology	2012	Professional/specialist Society	North America	USA	H - High income	focused	colorectal cancer	SRinsDT
145	ACR Appropriateness Criteria local excision in early-stage rectal cancer.	ACR	American College of Radiology	2014	Professional/specialist Society	North America	USA	H - High income	focused	colorectal cancer	SRinsDT
146	ACR Appropriateness Criteria rectal cancer—metastatic disease at presentation.	ACR	American College of Radiology	2014	Professional/specialist Society	North America	USA	H - High income	focused	colorectal cancer	SRinsDT
147	ACR Appropriateness Criteria® recurrent rectal cancer.	ACR	American College of Radiology	2014	Professional/specialist Society	North America	USA	H - High income	focused	colorectal cancer	SR
148	Early Stage Rectal Cancer	AHS	Alberta Health Services	2013	Government Agency	North America	Canada	H - High income	focused	colorectal cancer	SRinsDT
149	Practice parameters for the management of rectal cancer (revised)	ASCRS	American Society of Colon and Rectal Surgeons	2013	Professional/specialist Society	North America	USA	H - High income	broad	colorectal cancer	SR
150	Colorectal Cancer Association of Canada consensus meeting: raising the standards of care for early-stage rectal cancer	CCAC	Colorectal Cancer Association of Canada	2009	Professional/specialist Society	North America	Canada	H - High income	focused	colorectal cancer	noSR
151	Optimization of Preoperative Assessment in Patients Diagnosed with Rectal Cancer	CCO	Cancer Care Ontario	2014	Government Agency	North America	Canada	H - High income	focused	colorectal cancer	SR
152	Rectal cancer: ESMO Clinical Practice Guidelines for diagnosis, treatment and follow-up.	ESMO	European Society of Medical Oncology	2013	Professional/specialist Society	Europe	Europe	H - High income	broad	colorectal cancer	noSR
153	rectal cancer, version 2.2015	NCCN	National Comprehensive Cancer Network	2015	Professional/specialist Society	North America	USA	H - High income	broad	colorectal cancer	noLA
154	Clinical practice guidelines for the treatment and management of endometrial cancer	ACN	Australian Cancer Network	2011	Professional/specialist Society	Oceania	Australia	H - High income	focused	endometrial cancer	SR
155	Practice Bulletin No. 149: Endometrial cancer.	ACOG-SGO	American College of Obstetricians and Gynecologists - Society of Gynecologic Oncology	2015	Professional/specialist Society	North America	USA	H - High income	broad	endometrial cancer	SRinsDT
156	ACR Appropriateness Criteria pretreatment evaluation and follow-up of endometrial cancer of the uterus.	ACR	American College of Radiology	2013	Professional/specialist Society	North America	USA	H - High income	focused	endometrial cancer	SRinsDT
157	ACR Appropriateness Criteria Advanced Stage Endometrial Cancer	ACR	American College of Radiology	2014	Professional/specialist Society	North America	USA	H - High income	focused	endometrial cancer	SRinsDT
158	Interdisciplinary S2k guidelines on the diagnosis and treatment of endometrial carcinoma	AGO-DGGG-DKG	Arbeitsgemeinschaft Gynäkologische Onkologie (German Gynecological Oncology Group) - Deutsche Gesellschaft für Gynäkologie und Geburtshilfe (German Society for Gynecology and Obstetrics) - Deutsche Krebsgesellschaft (German Cancer Society)	2009	Professional/specialist Society	Europe	Germany	H - High income	broad	endometrial cancer	noSR
159	Endometrial cancer.	AHS	Alberta Health Services	2013	Government Agency	North America	Canada	H - High income	broad	endometrial cancer	SR
160	Management of endometrial cancer in Asia: consensus statement from the Asian Oncology Summit 2009	AOS	Asian Oncology Summit	2009	Independent Expert Panel	Asia	Asia (USA , Malaysia , Philippines, Singapore, South Korea, Taiwan, Thailand)	H; UM; LM	broad	endometrial cancer	SR
161	The role of postoperative radiation therapy for endometrial cancer: an ASTRO evidence-based guideline.	ASTRO	American Society for Radiation Oncology	2014	Professional/specialist Society	North America	USA	H - High income	focused	endometrial cancer	SRinsDT
162	Adjuvant treatment for endometrial cancer: literature review and recommendations by the Comite de l'evolution des pratiques en oncologie (CEPO).	CEPO	Comite de l'evolution des pratiques en oncologie	2013	Professional/specialist Society	Europe	Canada	H - High income	focused	endometrial cancer	SR
163	Endometrial cancer: ESMO Clinical Practice Guidelines for diagnosis, treatment and follow-up.	ESMO	European Society of Medical Oncology	2013	Professional/specialist Society	Europe	Europe	H - High income	broad	endometrial cancer	noSR
164	Endometrial carcinoma: treatment	FBAG-OSBC	Federação Brasileira das Associações de Ginecologia - Obstetrícia and Sociedade Brasileira de Cancerologia	2012	Professional/specialist Society	South America	Brasil	UM - Upper middle income	focused	endometrial cancer	SR
165	Clinical practice guidelines for the management of patients with endometrial cancer in France: recommendations of the Institut National du Cancer and the Societe Francaise d'Oncologie Gynecologique	INC-SFOG	Institut National du Cancer - Société Française d'Oncologie Gynécologique	2011	other	Europe	France	H - High income	broad	endometrial cancer	SRinsDT
166	Evidence-based guidelines for treatment of uterine body neoplasm in Japan: Japan Society of Gynecologic Oncology (JSGO) 2009 edition	JSGO	Japan Society of Gynecologic Oncology	2010	Professional/specialist Society	Asia	Japan	H - High income	focused	endometrial cancer	noLA
167	Uterine Neoplasms, version 2.2015	NCCN	National Comprehensive Cancer Network	2015	Professional/specialist Society	North America	USA	H - High income	broad	endometrial cancer	noLA
168	SEOM guidelines for endometrial cancer	SEOM	Sociedad Española de Oncología Médica (Spanish Society of Medical Oncology)	2012	Professional/specialist Society	Europe	Spain	H - High income	broad	endometrial cancer	noLA
169	Endometrial cancer: a review and current management strategies: part I.	SGO	Society of Gynecologic Oncology	2014	Professional/specialist Society	North America	USA	H - High income	broad	endometrial cancer	noSR
170	The role of surgery in endometrial cancer	SOGC-GOC-SCC	Society of Obstetricians and Gynaecologists of Canada - Society of Gynecologic Oncologists of Canada - Society of Canadian Colposcopists	2013	Professional/specialist Society	North America	Canada	H - High income	broad	endometrial cancer	SR
171	Esophageal Cancer	AHS	Alberta Health Services	2013	Government Agency	North America	Canada	H - High income	broad	esophageal cancer	SRinsDT
172	Management of patients with early esophageal cancer, dysplastic and non-dysplastic Barrett's esophagus.	AHS	Alberta Health Services	2014	Government Agency	North America	Canada	H - High income	focused	esophageal cancer	SR
173	Tumori dell'esofago e della giunzione gastroesofagea	AIOM	Associazione Italiana di Oncologia Medica	2015	Professional/specialist Society	Europe	Italy	H - High income	broad	esophageal cancer	noSR
174	Preoperative or postoperative therapy for resectable oesophageal cancer: an updated practice guideline	CCO	Cancer Care Ontario	2014	Government Agency	North America	Canada	H - High income	focused	esophageal cancer	SR
175	PET imaging in esophageal cancer.	CCO	Cancer Care Ontario	2010	Government Agency	North America	Canada	H - High income	focused	esophageal cancer	SR
176	Oesophageal cancer: ESMO Clinical Practice Guidelines for diagnosis, treatment and follow-up.	ESMO	European Society of Medical Oncology	2013	Professional/specialist Society	Europe	Europe	H - High income	broad	esophageal cancer	noSR
177	Diagnostic evaluation, surgical technique, and perioperative management after esophagectomy: consensus statement of the German Advanced Surgical Treatment Study Group	GAST	German Advanced Surgical Treatment Study Group	2011	Independent Expert Panel	Europe	Germany	H - High income	focused	esophageal cancer	noLA
178	Guidelines for Diagnosis and Treatment of Carcinoma of the Esophagus April 2012 edited by the Japan Esophageal Society.	JES	Japan Esophageal Society	2015	Professional/specialist Society	Asia	Japan	H - High income	broad	esophageal cancer	noSR
179	Management of early-stage esophageal neoplasia (MESEN) consensus.	mep	multidisciplinary expert panel	2014	Independent Expert Panel	North America	USA	H - High income	focused	esophageal cancer	noSR
180	Consensus statements for management of Barrett's dysplasia and early-stage esophageal adenocarcinoma, based on a Delphi process	mep	multidisciplinary expert panel	2012	Independent Expert Panel	international	international (Europe, North America, Australia, Japan)	H - High income	focused	esophageal cancer	SR
181	Esophageal and esophagogastric junction cancers, version 3.2015	NCCN	National Comprehensive Cancer Network	2015	Professional/specialist Society	North America	USA	H - High income	broad	esophageal cancer	noLA
182	Clinical Practice Guidelines for the Management of Barrett’s Oesophagus and Early Oesophageal Adenocarcinoma	NHMRC (CCA)	National Health and Medical Research Council (Cancer Council Australia)	2014	other	Oceania	Australia	H - High income	focused	esophageal cancer	SR
183	SEOM clinical guidelines for the treatment of oesophageal cancer	SEOM	Sociedad Española de Oncología Médica (Spanish Society of Medical Oncology)	2011	Professional/specialist Society	Europe	Spain	H - High income	focused	esophageal cancer	noLA
184	Saudi Oncology Society clinical management guideline series. Esophageal cancer 2014.	SOS	Saudi Oncology Society	2014	Professional/specialist Society	Asia	Saudi	H - High income	broad	esophageal cancer	SRinsDT
185	The society of thoracic surgeons guidelines on the diagnosis and staging of patients with esophageal cancer	STS	Society of Thoracic Surgeons	2013	Professional/specialist Society	North America	USA	H - High income	focused	esophageal cancer	SR
186	Brazilian consensus in gastric cancer: guidelines for gastric cancer in Brazil	ABCG	Brazilian Association of Gastric Cancer	2013	Professional/specialist Society	South America	Brasil	UM - Upper middle income	broad	gastric cancer	noSR
187	Gastric carcinoma. Nation-wide guideline	ACCC	Association of Comprehensive Cancer Centres	2009	Professional/specialist Society	Europe	Netherlands	H - High income	broad	gastric cancer	SR
188	Gastric Cancer	AHS	Alberta Health Services	2013	Government Agency	North America	Canada	H - High income	broad	gastric cancer	SRinsDT
189	Neoplasie dello stomaco	AIOM	Associazione Italiana di Oncologia Medica	2015	Professional/specialist Society	Europe	Italy	H - High income	broad	gastric cancer	noSR
190	Neoadjuvant or adjuvant therapy for resectable gastric cancer: a systematic review and practice guideline for North America	CCO	Cancer Care Ontario	2013	Government Agency	North America	Canada	H - High income	focused	gastric cancer	SR
191	Systemic therapy for advanced gastric cancer.	CCO	Cancer Care Ontario	2014	Government Agency	North America	Canada	H - High income	focused	gastric cancer	SR
192	Gastric cancer: ESMO-ESSO-ESTRO Clinical Practice Guidelines for diagnosis, treatment and follow-up	ESMO-ESSO-ESTRO	European Society of Medical Oncology - European Society of Surgical Oncology - European SocieTy for Radiotherapy & Oncology	2013	Professional/specialist Society	Europe	Europe	H - High income	broad	gastric cancer	noSR
193	The diagnosis and management of gastric cancer: expert discussion and recommendations from the 12th ESMO/World Congress on Gastrointestinal Cancer, Barcelona, 2010	ESMO-WCGIC	European Society Medical Oncology - World Congress Gastrointestinal Cancer	2011	Professional/specialist Society	international	international (Europe, USA, Australia, Israel, Japan, South Korea)	H - High income	broad	gastric cancer	noLA
194	Indian Council of Medical Research consensus document for the management of gastric cancer.	ICMR	Indian Council of Medical Research	2014	Government Agency	Asia	India	LM - Lower middle income	broad	gastric cancer	noSR
195	Japanese gastric cancer treatment guidelines 2010 (ver. 3)	JGCA	Japanese Gastric Cancer Association	2011	Professional/specialist Society	Asia	Japan	H - High income	broad	gastric cancer	noLA
196	Clinical practice guidelines for gastric cancer in Korea: an evidence-based approach.	mep	multidisciplinary expert panel	2014	Independent Expert Panel	Asia	South Korea	H - High income	broad	gastric cancer	SRinsDT
197	Follow-up after gastrectomy for cancer: results of an international web round table.	mep	multidisciplinary expert panel	2014	Independent Expert Panel	international	international (Europe, Brazil, Japan, South Korea)	H; UM	focused	gastric cancer	noLA
198	Gastric cancer, version 2.2015	NCCN	National Comprehensive Cancer Network	2015	Professional/specialist Society	North America	USA	H - High income	broad	gastric cancer	noLA
199	Polish consensus on treatment of gastric cancer; update 2013.	PGCSG	Polish Study Group on Gastric Cancer	2013	Independent Expert Panel	Europe	Poland	H - High income	focused	gastric cancer	noLA
200	SEOM clinical guidelines for the diagnosis and treatment of gastric adenocarcinoma	SEOM	Sociedad Española de Oncología Médica (Spanish Society of Medical Oncology)	2012	Professional/specialist Society	Europe	Spain	H - High income	broad	gastric cancer	noLA
201	The SIC-GIRCG 2013 Consensus Conference on Gastric Cancer.	SIC-GIRCG	Società Italiana di Chirurgia (Italian Society of Surgery) - Gruppo Italiano Ricerca Cancro Gastrico (Italian Research Group for Gastric Cancer)	2014	Professional/specialist Society	Europe	Italy	H - High income	broad	gastric cancer	noLA
202	Saudi Oncology Society clinical management guideline series. Gastric cancer 2014.	SOS	Saudi Oncology Society	2014	Professional/specialist Society	Asia	Saudi	H - High income	broad	gastric cancer	noLA
203	Recommendations on current approach to gastric cancer	TTD	Grupo Español de Tratamiento de los Tumores Digestivos	2009	Professional/specialist Society	Europe	Spain	H - High income	broad	gastric cancer	noLA
204	Tumori della testa e del collo	AIOM	Associazione Italiana di Oncologia Medica	2015	Professional/specialist Society	Europe	Italy	H - High income	broad	head and neck cancer	noSR
205	The management of head and neck cancer in Ontario: organizational and clinical practice guideline recommendations.	CCO	Cancer Care Ontario	2014	Government Agency	North America	Canada	H - High income	focused	head and neck cancer	SR
206	European Laryngological Society: ELS recommendations for the follow-up of patients treated for laryngeal cancer.	ELS	European Laryngological Society	2014	Professional/specialist Society	Europe	Europe	H - High income	focused	head and neck cancer	SRnoDT
207	Guidelines for treatment of recurrent or metastatic head and neck cancer.	ICON	Indian Cooperative Oncology Network	2014	Professional/specialist Society	Asia	India	LM - Lower middle income	focused	head and neck cancer	noSR
208	Head and neck cancers, version 1.2015	NCCN	National Comprehensive Cancer Network	2015	Professional/specialist Society	North America	USA	H - High income	broad	head and neck cancer	noLA
209	SEOM clinical guidelines for the treatment of head and neck cancer (HNC) 2013.	SEOM	Sociedad Española de Oncología Médica (Spanish Society of Medical Oncology)	2013	Professional/specialist Society	Europe	Spain	H - High income	focused	head and neck cancer	noLA
210	Linee Guida sul “Cancro della Laringe”	SIOeChSF	Società Italiana di Otorinolaringologia e Chirurgia Cervico-Facciale	2014	Professional/specialist Society	Europe	Italy	H - High income	broad	head and neck cancer	noLA
211	Nasopharyngeal cancer treatment.	AHS	Alberta Health Services	2013	Government Agency	North America	Canada	H - High income	broad	head and neck cancer	SR
212	Nasopharyngeal cancer: EHNS-ESMO-ESTRO Clinical Practice Guidelines for diagnosis, treatment and follow-up	ESMO-EHNS-ESTRO	European Society of Medical Oncology - European Head and Neck Society - European SocieTy for Radiotherapy & Oncology	2012	Professional/specialist Society	Europe	Europe	H - High income	broad	head and neck cancer	noSR
213	SEOM clinical guidelines for the treatment of nasopharyngeal carcinoma 2013.	SEOM	Sociedad Española de Oncología Médica (Spanish Society of Medical Oncology)	2013	Professional/specialist Society	Europe	Spain	H - High income	focused	head and neck cancer	noLA
214	Comprehensive treatment of squamous cell cancer of head and neck: Chinese expert consensus 2013.	SHNTS-SRT-CACA	Society of Head & Neck Tumor Surgery - Society of Radiation Therapy - Chinese Anti-Cancer Association.	2014	Professional/specialist Society	Asia	China	UM - Upper middle income	focused	head and neck cancer	noLA
215	Squamous cell carcinoma of the head and neck: EHNS-ESMO-ESTRO Clinical Practice Guidelines for diagnosis, treatment and follow-up	ESMO-EHNS-ESTRO	European Society of Medical Oncology - European Head and Neck Society - European SocieTy for Radiotherapy & Oncology	2010	Professional/specialist Society	Europe	Europe	H - High income	broad	head and neck cancer	noSR
216	GEC-ESTRO recommendations for brachytherapy for head and neck squamous cell carcinomas	GEC-ESTRO	Groupe Européen de Curiethérapie (European Brachytherapy Group) - European SocieTy for Radiotherapy & Oncology	2009	Professional/specialist Society	Europe	Europe	H - High income	focused	head and neck cancer	noLA
217	Initial staging of squamous cell carcinoma of the oral cavity, larynx and pharynx (excluding nasopharynx). Part I: Locoregional extension assessment: 2012 SFORL guidelines	SFORL	Société Française d'ORL et de Chirurgie de la Face et du Cou (French Society of Otorhinolaryngology)	2013	Professional/specialist Society	Europe	France	H - High income	focused	head and neck cancer	noSR
218	PET imaging in head and neck cancer: recommendations.	CCO	Cancer Care Ontario	2012	Government Agency	North America	Canada	H - High income	focused	head and neck cancer	SR
219	Treatment of head and neck cancer in the elderly: European Consensus (panel 6) at the EUFOS Congress in Vienna 2007	EUFOS	European Federation of Oto-Rhino-Laryngological Societies	2010	Professional/specialist Society	Europe	Europe	H - High income	focused	head and neck cancer	noLA
220	Hong Kong consensus recommendations on the management of hepatocellular carcinoma.	mep	multidisciplinary expert panel	2015	Independent Expert Panel	Asia	China	UM - Upper middle income	focused	hepatocellular carcinoma	noLA
222	Hepatocellular carcinoma: Dutch guideline for surveillance, diagnosis and therapy.	ACCC	Association of Comprehensive Cancer Centres	2014	Professional/specialist Society	Europe	Netherlands	H - High income	broad	hepatocellular carcinoma	noLA
223	Management of hepatocellular carcinoma: an update.	AASLD	American Association for the Study of Liver Diseases	2011	other	North America	USA	H - High income	broad	hepatocellular carcinoma	SRinsDT
224	Summary of the 2010 AHPBA/SSO/SSAT Consensus Conference on HCC	AHPBA-SSO-SSAT	Americas HepatoPancreato-Biliary Association - Society of Surgical Oncology - Society for Surgery of the Alimentary Tract	2011	Professional/specialist Society	North America	USA	H - High income	focused	hepatocellular carcinoma	noLA
225	Hepatocellular Carcinoma	AHS	Alberta Health Services	2014	Government Agency	North America	Canada	H - High income	broad	hepatocellular carcinoma	SRinsDT
226	Epatocarcinoma	AIOM	Associazione Italiana di Oncologia Medica	2015	Professional/specialist Society	Europe	Italy	H - High income	broad	hepatocellular carcinoma	noSR
227	Position paper of the Italian Association for the Study of the Liver (AISF): the multidisciplinary clinical approach to hepatocellular carcinoma	AISF	Associazione Italiana per lo studio del Fegato	2013	Professional/specialist Society	Europe	Italy	H - High income	broad	hepatocellular carcinoma	noSR
228	Management of hepatocellular carcinoma in Asia: consensus statement from the Asian Oncology Summit 2009	AOS	Asian Oncology Summit	2009	Independent Expert Panel	Asia	Asia (Belgium, USA, Hong Kong , Japan, Malaysia, Myanmar, Singapore , Taiwan)	H; UM; LM	broad	hepatocellular carcinoma	SR
229	Asian Pacific Association for the Study of the Liver consensus recommendations on hepatocellular carcinoma	APASL	Asian Paciﬁc Association for the Study of the Liver	2010	Professional/specialist Society	Asia	Asia (China, India, Indonesia, Japan, Pakistan, Singapore, South Korea, Taiwan)	H; UM; LM	broad	hepatocellular carcinoma	SRnoDT
230	Consensus Development from the 5th Asia-Pacific Primary Liver Cancer Expert Meeting (APPLE 2014).	APPLE	Asia-Pacific Primary Liver Cancer Expert Meeting	2015	Independent Expert Panel	Asia	Asia (China, Hong Kong, Japan, South Korea, Taiwan)	H; UM	focused	hepatocellular carcinoma	noLA
231	Diagnosis and management of hepatocellular carcinoma: results of a consensus meeting of The Ottawa Hospital Cancer Centre	ccp	canadian consensus panel	2010	Independent Expert Panel	North America	Canada	H - High income	broad	hepatocellular carcinoma	noLA
232	EASL-EORTC clinical practice guidelines: management of hepatocellular carcinoma	EASL-EORTC	European Association for the Study of the Liver - European Organisation for Research and Treatment of Cancer	2012	Professional/specialist Society	Europe	Europe	H - High income	broad	hepatocellular carcinoma	noSR
233	Consensus recommendations and review by an International Expert Panel on Interventions in Hepatocellular Carcinoma (EPOIHCC)	EPOIHCC	Expert Panel Opinion on Interventions in Hepatocellular Carcinoma	2013	Independent Expert Panel	international	international (USA, China, Hong Kong, India, Indonesia, Japan, Korea, Malaysia, Singapore, Taiwan, Thailand)	H; UM; LM	focused	hepatocellular carcinoma	noSR
234	Hepatocellular carcinoma: ESMO-ESDO Clinical Practice Guidelines for diagnosis, treatment and follow-up	ESMO-ESDO	European Society of Medical Oncology - European Society of Digestive Oncology	2012	Professional/specialist Society	Europe	Europe	H - High income	broad	hepatocellular carcinoma	noSR
235	The Indian National Association for Study of the Liver (INASL) Consensus on Prevention, Diagnosis and Management of Hepatocellular Carcinoma in India: The Puri Recommendations.	INASL	Indian National Association for Study of the Liver	2014	Professional/specialist Society	Asia	India	LM - Lower middle income	broad	hepatocellular carcinoma	noSR
236	Evidence-based Clinical Practice Guidelines for Hepatocellular Carcinoma: The Japan Society of Hepatology 2013 update (3rd JSH-HCC Guidelines).	JSH	Japan Society of Hepatology	2013	Professional/specialist Society	Asia	Japan	H - High income	broad	hepatocellular carcinoma	SR
237	Surveillance and diagnostic algorithm for hepatocellular carcinoma proposed by the Liver Cancer Study Group of Japan: 2014 update.	LCSGJ	Liver Cancer Study Group of Japan	2014	Independent Expert Panel	Asia	Japan	H - High income	focused	hepatocellular carcinoma	noLA
238	Management of hepatocellular carcinoma: Report of Consensus Meeting in the 45th Annual Meeting of the Japan Society of Hepatology (2009)	JSH	Japan Society of Hepatology	2010	Professional/specialist Society	Asia	Japan	H - High income	broad	hepatocellular carcinoma	noLA
239	2014 KLCSG-NCC Korea Practice Guideline for the Management of Hepatocellular Carcinoma.	KLCSG-NCC	Korean Liver Cancer Study Group-National Cancer Center	2015	other	Asia	South Korea	H - High income	focused	hepatocellular carcinoma	SRinsDT
240	Latin American Association for the Study of the Liver (LAASL) clinical practice guidelines: management of hepatocellular carcinoma.	LAASL	Latin American Association for the Study of the Liver	2014	Professional/specialist Society	South America	Latin America (Argentina, Brazil, Chile, Colombia, Mexico, Venezuela)	H; UM	broad	hepatocellular carcinoma	noSR
241	Multidisciplinary Canadian consensus recommendations for the management and treatment of hepatocellular carcinoma	mep	multidisciplinary expert panel	2011	Independent Expert Panel	North America	Canada	H - High income	broad	hepatocellular carcinoma	SR
242	Recommendations for liver transplantation for hepatocellular carcinoma: an international consensus conference report	OLT4HCG	OLT for HCC Consensus Group	2012	Independent Expert Panel	international	international (Europe, North America)	H - High income	focused	hepatocellular carcinoma	SR
243	Saudi guidelines for the diagnosis and management of hepatocellular carcinoma: technical review and practice guidelines	SGA	Saudi Gastroenterology Association	2012	Professional/specialist Society	Asia	Saudi	H - High income	broad	hepatocellular carcinoma	SRnoDT
244	Quality improvement guidelines for transhepatic arterial chemoembolization, embolization, and chemotherapeutic infusion for hepatic malignancy.	SIR	Society of Interventional Radiology	2012	Professional/specialist Society	North America	USA	H - High income	focused	hepatocellular carcinoma	SR
245	The management of hepatocellular carcinoma. Current expert opinion and recommendations derived from the 10th World Congress on Gastrointestinal Cancer, Barcelona, 2008	WCGC	World Congress on Gastrointestinal Cancer	2009	Independent Expert Panel	international	international (Europe, North America, Brasil, Israel, Japan)	H; UM	broad	hepatocellular carcinoma	noLA
246	Hepatocellular carcinoma (HCC): a global perspective	WGO	World Gastroenterology Organisation	2010	Professional/specialist Society	international	international (Europe, North America, Japan, South Africa, Thailand)	H; UM	focused	hepatocellular carcinoma	noLA
247	Society of Interventional Radiology position statement on percutaneous radiofrequency ablation for the treatment of liver tumors.	SIR	Society of Interventional Radiology	2009	Professional/specialist Society	North America	USA	H - High income	focused	hepatocellular carcinoma	noLA
248	ACR Appropriateness Criteria® liver lesion — initial characterization.	ACR	American College of Radiology	2014	Professional/specialist Society	North America	USA	H - High income	focused	hepatocellular carcinoma	SRinsDT
249	Italian guidelines for noninvasive imaging assessment of focal liver lesions: development and conclusions	SNLG	Sistema Nazionale Linee Guida	2011	Government Agency	Europe	Italy	H - High income	focused	hepatocellular carcinoma	SR
250	Guideline on management of solitary pulmonary nodule.	SEPAR	Sociedad Española de Neumología y Cirugía Torácica (Spanish Society of Pulmonology and Thoracic Surgery)	2014	Professional/specialist Society	Europe	Spain	H - High income	focused	lung cancer	noLA
251	ACR Appropriateness Criteria® radiographically detected solitary pulmonary nodule.	ACR	American College of Radiology	2012	Professional/specialist Society	North America	USA	H - High income	focused	lung cancer	SRinsDT
252	ACR Appropriateness Criteria® radiologic management of thoracic nodules and masses.	ACR	American College of Radiology	2011	Professional/specialist Society	North America	USA	H - High income	focused	lung cancer	SRinsDT
253	Recommendations for the management of subsolid pulmonary nodules detected at CT: a statement from the Fleischner Society	FS	Fleischner Society	2013	Professional/specialist Society	international	international (Europe, North America, Brazil, China, Hong Kong, India, Japan, Pakistan, Thailand, Sudan, Nigeria, South Africa)	H; UM; LM, L	focused	lung cancer	SRnoDT
254	Guideline for referral of patients with suspected lung cancer by family physicians and other primary care providers.	CCO	Cancer Care Ontario	2014	Government Agency	North America	Canada	H - High income	focused	lung cancer	SR
255	Screening for lung cancer: diagnosis and management of lung cancer, 3rd ed: American College of Chest Physicians evidence-based clinical practice guidelines.	ACCP	American College of Chest Physicians	2013	Professional/specialist Society	North America	USA	H - High income	broad	lung cancer	SR
256	ACR Appropriateness Criteria® non-invasive clinical staging of bronchogenic carcinoma.	ACR	American College of Radiology	2013	Professional/specialist Society	North America	USA	H - High income	focused	lung cancer	SRinsDT
257	Neoplasie del polmone	AIOM	Associazione Italiana di Oncologia Medica	2015	Professional/specialist Society	Europe	Italy	H - High income	broad	lung cancer	noSR
258	Guidelines on the radical management of patients with lung cancer	BTS-SCTS	British Thoracic Society - Society for Cardiothoracic Surgery	2010	Professional/specialist Society	Europe	UK	H - High income	focused	lung cancer	SR
259	18-Fluorodeoxyglucose Positron Emission Tomography in the Diagnosis and Staging of Lung Cancer	CCO	Cancer Care Ontario	2012	Government Agency	North America	Canada	H - High income	focused	lung cancer	SR
260	Follow-up and surveillance of curatively treated lung cancer patients.	CCO	Cancer Care Ontario	2014	Government Agency	North America	Canada	H - High income	focused	lung cancer	SR
261	Chinese guidelines on the diagnosis and treatment of primary lung cancer (2011)	CMH	Chinese Ministry of Health	2012	Government Agency	Asia	China	UM - Upper middle income	broad	lung cancer	noLA
262	Surrogate markers predicting overall survival for lung cancer: ELCWP recommendations	ELCWP	European Lung Cancer Working Party	2012	Independent Expert Panel	Europe	Europe	H - High income	focused	lung cancer	SR
263	Prevention, diagnosis, therapy, and follow-up of lung cancer: interdisciplinary guideline of the German Respiratory Society and the German Cancer Society	DGP-DKG	Deutsche Gesellschaft für Pneumologie und Beatmungsmedizin(German Respiratory Society) - Deutsche Krebsgesellschaft (German Cancer Society)	2011	Professional/specialist Society	Europe	Germany	H - High income	broad	lung cancer	noLA
264	Lung Cancer OncoGuia	OGG	OncoGuia Group	2009	Government Agency	Europe	Spain	H - High income	broad	lung cancer	noLA
265	Consensus statement on palliative lung radiotherapy: third international consensus workshop on palliative radiotherapy and symptom control	cep	consensus expert panel	2012	Independent Expert Panel	international	international (UK, North America, Australia)	H - High income	focused	lung cancer	SRinsDT
266	Lung cancer. The diagnosis and treatment of lung cancer.	NICE	National Institute for Health and Care Excellence (National Collaborating Centre for Cancer)	2011	Government Agency	Europe	UK	H - High income	broad	lung cancer	SR
267	Recommendations for radiological diagnosis and assessment of treatment response in lung cancer: a national consensus statement by the Spanish Society of Medical Radiology and the Spanish Society of Medical Oncology.	SEOM-SERAM	Sociedad Española de Oncología Médica (Spanish Society of Medical Oncology) - Sociedad Española de Radiología Médica (Spanish Society of Medical Radiology)	2015	Professional/specialist Society	Europe	Spain	H - High income	focused	lung cancer	noLA
268	SEPAR guidelines for lung cancer staging	SEPAR	Sociedad Española de Neumología y Cirugía Torácica (Spanish Society of Pulmonology and Thoracic Surgery)	2011	Professional/specialist Society	Europe	Spain	H - High income	focused	lung cancer	noLA
269	Management of lung cancer. A national clinical guideline.	SIGN	Scottish Intercollegiate Guidelines Network	2014	Government Agency	Europe	UK	H - High income	broad	lung cancer	SR
270	Guidelines for the role of FDG-PET/CT in lung cancer management	STS-SOS	Saudi Thoracic Society - Saudi Oncology Society	2012	Professional/specialist Society	Asia	Saudi	H - High income	focused	lung cancer	noLA
271	ACR Appropriateness Criteria® nonsurgical treatment for locally advanced non-small-cell lung cancer: good performance status/definitive intent.	ACR	American College of Radiology	2014	Professional/specialist Society	North America	USA	H - High income	focused	lung cancer	SRinsDT
272	ACR Appropriateness Criteria® early-stage non–small-cell lung cancer.	ACR	American College of Radiology	2013	Professional/specialist Society	North America	USA	H - High income	focused	lung cancer	SRinsDT
273	Non-small cell lung cancer stage I.	AHS	Alberta Health Services	2014	Government Agency	North America	Canada	H - High income	focused	lung cancer	SR
274	Non-small cell lung cancer stage II.	AHS	Alberta Health Services	2014	Government Agency	North America	Canada	H - High income	focused	lung cancer	SR
275	Non-small cell lung cancer stage III.	AHS	Alberta Health Services	2012	Government Agency	North America	Canada	H - High income	focused	lung cancer	SR
276	Non-small cell lung cancer stage IV.	AHS	Alberta Health Services	2013	Government Agency	North America	Canada	H - High income	focused	lung cancer	SR
277	Systemic Therapy for Stage IV Non-Small-Cell Lung Cancer: American Society of Clinical Oncology Clinical Practice Guideline Update	ASCO	American Society of Clinical Oncology	2015	Professional/specialist Society	North America	USA	H - High income	focused	lung cancer	SR
278	Definitive radiation therapy in locally advanced non-small cell lung cancer: Executive summary of an American Society for Radiation Oncology (ASTRO) evidence-based clinical practice guideline.	ASTRO	American Society for Radiation Oncology	2015	Professional/specialist Society	North America	USA	H - High income	focused	lung cancer	SR
279	Definitive and Adjuvant Radiotherapy in Locally Advanced Non-Small-Cell Lung Cancer: American Society of Clinical Oncology Clinical Practice Guideline Endorsement of the American Society for Radiation Oncology Evidence-Based Clinical Practice Guideline.	ASCO(ASTRO)	American Society of Clinical Oncology / American Society for Radiation Oncology	2015	Professional/specialist Society	North America	USA	H - High income	focused	lung cancer	SR
280	Third CECOG consensus on the systemic treatment of non-small-cell lung cancer	CECOG	Central European Cooperative Oncology Group	2012	Independent Expert Panel	Europe	Europe	H - High income	focused	lung cancer	SRinsDT
281	Stereotactic Ablative Radiation Therapy for the Treatment of Early-stage Non-Small-Cell Lung Cancer: CEPO Review and Recommendations.	CEPO	Comité de l'évolution des pratiques en oncologie	2015	Professional/specialist Society	North America	Canada	H - High income	focused	lung cancer	SR
282	2nd ESMO Consensus Conference on Lung Cancer: early-stage non-small-cell lung cancer consensus on diagnosis, treatment and follow-up.	ESMO	European Society of Medical Oncology	2014	Professional/specialist Society	Europe	Europe	H - High income	focused	lung cancer	noSR
283	Early and locally advanced non-small-cell lung cancer (NSCLC): ESMO Clinical Practice Guidelines for diagnosis, treatment and follow-up.	ESMO	European Society of Medical Oncology	2013	Professional/specialist Society	Europe	Europe	H - High income	focused	lung cancer	noSR
284	Metastatic non-small-cell lung cancer (NSCLC): ESMO Clinical Practice Guidelines for diagnosis, treatment and follow-up.	ESMO	European Society of Medical Oncology	2014	Professional/specialist Society	Europe	Europe	H - High income	focused	lung cancer	noSR
285	Revised ESTS guidelines for preoperative mediastinal lymph node staging for non-small-cell lung cancer.	ESTS	European Society of Thoracic Surgeons	2014	Professional/specialist Society	Europe	Europe	H - High income	focused	lung cancer	noSR
286	Non-small cell lung cancer, version 5.2015	NCCN	National Comprehensive Cancer Network	2015	Professional/specialist Society	North America	USA	H - High income	broad	lung cancer	noLA
287	SEOM clinical guidelines for the treatment of non-small cell lung cancer (NSCLC) 2013.	SEOM	Sociedad Española de Oncología Médica (Spanish Society of Medical Oncology)	2013	Professional/specialist Society	Europe	Spain	H - High income	focused	lung cancer	noLA
288	Maintenance treatment of advanced non-small-cell lung cancer: results of an international expert panel meeting of the Italian association of thoracic oncology	AIOT	Associazione Italiana di Oncologia Toracica (Italian Association of Thoracic Oncology)	2012	Professional/specialist Society	Europe	Italy	H - High income	focused	lung cancer	SRinsDT
289	Treatment of advanced non-small-cell lung cancer: Italian Association of Thoracic Oncology (AIOT) clinical practice guidelines	AIOT	Associazione Italiana di Oncologia Toracica (Italian Association of Thoracic Oncology)	2011	Professional/specialist Society	Europe	Italy	H - High income	focused	lung cancer	SRinsDT
290	First-line systemic treatment of advanced stage non-small-cell lung cancer in Asia: consensus statement from the Asian Oncology Summit 2009	AOS	Asian Oncology Summit	2009	Independent Expert Panel	Asia	Asia (UK, USA, China, Hong Kong, Singapore, South Korea , Taiwan)	H; UM	focused	lung cancer	SR
291	First-line systemic chemotherapy in the treatment of advanced non-small cell lung cancer.	CCO	Cancer Care Ontario	2014	Government Agency	North America	Canada	H - High income	focused	lung cancer	SR
292	ACR Appropriateness Criteria® radiation therapy for small-cell lung cancer.	ACR	American College of Radiology	2012	Professional/specialist Society	North America	USA	H - High income	focused	lung cancer	SRinsDT
293	Small Cell Lung Cancer - Extensive Stage	AHS	Alberta Health Services	2012	Government Agency	North America	Canada	H - High income	focused	lung cancer	SR
294	Small Cell Lung Cancer - Limited Stage	AHS	Alberta Health Services	2012	Government Agency	North America	Canada	H - High income	focused	lung cancer	SR
295	PET imaging in small cell lung cancer: recommendations.	CCO	Cancer Care Ontario	2009	Government Agency	North America	Canada	H - High income	focused	lung cancer	SR
296	Treatment of Small-Cell Lung Cancer: American Society of Clinical Oncology Endorsement of the American College of Chest Physicians Guideline	ASCO(ACCP)	American Society of Clinical Oncology / American College of Chest Physicians	2015	Professional/specialist Society	North America	USA	H - High income	focused	lung cancer	SR
297	1st ESMO Consensus Conference in lung cancer; Lugano 2010: small-cell lung cancer	ESMO	European Society of Medical Oncology	2011	Professional/specialist Society	Europe	Europe	H - High income	broad	lung cancer	noSR
298	Small-cell lung cancer (SCLC): ESMO Clinical Practice Guidelines for diagnosis, treatment and follow-up	ESMO-JSMO	European Society of Medical Oncology - Japanese Society of Medical Oncology	2013	Professional/specialist Society	Europe	Europe	H - High income	broad	lung cancer	noSR
299	Small cell lung cancer, version 1.2015	NCCN	National Comprehensive Cancer Network	2015	Professional/specialist Society	North America	USA	H - High income	broad	lung cancer	noLA
300	SEOM clinical guidelines for the treatment of small-cell lung cancer 2013.	SEOM	Sociedad Española de Oncología Médica (Spanish Society of Medical Oncology)	2013	Professional/specialist Society	Europe	Spain	H - High income	focused	lung cancer	noLA
301	Superior Sulcus (Pancoast) Tumours	AHS	Alberta Health Services	2012	Government Agency	North America	Canada	H - High income	focused	lung cancer	SR
302	Thymic neoplasms.	AHS	Alberta Health Services	2010	Government Agency	North America	Canada	H - High income	broad	lung cancer	SR
303	Thymomas and thymic carcinomas, version 1.2014	NCCN	National Comprehensive Cancer Network	2014	Professional/specialist Society	North America	USA	H - High income	broad	lung cancer	noLA
304	The management of thymoma: guideline recommendations.	CCO	Cancer Care Ontario	2014	Government Agency	North America	Canada	H - High income	focused	lung cancer	SR
305	Guidelines of care for the management of primary cutaneous melanoma.	AAD	American Academy of Dermatology	2011	Professional/specialist Society	North America	USA	H - High income	broad	melanoma	noSR
306	Melanoma guideline 2012 v2.0	ACCC	Association of Comprehensive Cancer Centres	2013	Professional/specialist Society	Europe	Netherlands	H - High income	broad	melanoma	noSR
307	Systemic therapy for unresectable stage III or metastatic cutaneous melanoma.	AHS	Alberta Health Services	2015	Government Agency	North America	Canada	H - High income	focused	melanoma	SR
308	Preoperative and pretreatment investigations for malignant melanoma.	AHS	Alberta Health Services	2013	Government Agency	North America	Canada	H - High income	focused	melanoma	SR
309	Referral and follow-up surveillance of cutaneous melanoma.	AHS	Alberta Health Services	2013	Government Agency	North America	Canada	H - High income	focused	melanoma	SR
310	Management of resectable stage IV primary cutaneous melanoma without nodal disease.	AHS	Alberta Health Services	2013	Government Agency	North America	Canada	H - High income	focused	melanoma	SR
311	Melanoma	AIOM	Associazione Italiana di Oncologia Medica	2015	Professional/specialist Society	Europe	Italy	H - High income	broad	melanoma	noSR
312	Revised U.K. guidelines for the management of cutaneous melanoma 2010.	BAD	British Association of Dermatologists	2010	Professional/specialist Society	Europe	UK	H - High income	broad	melanoma	SR
313	PET imaging in melanoma: recommendations.	CCO	Cancer Care Ontario	2009	Government Agency	North America	Canada	H - High income	focused	melanoma	SR
314	Meeting report: consensus from the first and second Global Workshops in Melanoma November 19-20, 2008	ecp	expert consensus panel	2009	Independent Expert Panel	North America	USA	H - High income	broad	melanoma	noLA
315	Diagnosis and treatment of melanoma. European consensus-based interdisciplinary guideline--Update 2012	EDF-EADO-EORTC	European Dermatology Forum - European Association of Dermato-Oncology - European Organization of Research and Treatment of Cancer	2012	Professional/specialist Society	Europe	Europe	H - High income	broad	melanoma	SRnoDT
316	Cutaneous melanoma: ESMO Clinical Practice Guidelines for diagnosis, treatment and follow-up	ESMO	European Society of Medical Oncology	2012	Professional/specialist Society	Europe	Europe	H - High income	broad	melanoma	noSR
317	Melanoma.	FMSD	Finnish Medical Society Duodecim	2010	Professional/specialist Society	Europe	Finland	H - High income	broad	melanoma	noLA
318	Melanoma: diagnosis, staging, and treatment. Consensus group recommendations.	GEM	Grupo Español Multidisciplinar de Melanoma	2014	Independent Expert Panel	Europe	Spain	H - High income	broad	melanoma	noLA
319	Standardization and quality control of surgical treatment of cutaneous melanoma: looking for consensus of the Italian melanoma intergroup.	IMI	Italian Melanoma Intergroup	2015	Independent Expert Panel	Europe	Italy	H - High income	focused	melanoma	noLA
320	Melanoma, version 3.2015	NCCN	National Comprehensive Cancer Network	2015	Professional/specialist Society	North America	USA	H - High income	broad	melanoma	noLA
321	Melanoma: assessment and management	NICE	National Institute for Health and Care Excellence	2015	Government Agency	Europe	UK	H - High income	broad	melanoma	SR
322	Malignant melanoma S3-guideline "diagnosis, therapy and follow-up of melanoma".	GGPO-S3	German Guideline Program in Oncology	2013	Professional/specialist Society	Europe	Germany	H - High income	broad	melanoma	noLA
323	Updated Swiss guidelines for the treatment and follow-up of cutaneous melanoma	SCL	Swiss Cancer League	2011	other	Europe	Switzerland	H - High income	broad	melanoma	noLA
324	Linee guida e raccomandazioni SIDeMaST 2011	SIDeMaST	Società Italiana di Dermatologia medica, chirurgica, estetica e delle Malattie Sessualmente Trasmesse	2011	Professional/specialist Society	Europe	Italy	H - High income	broad	melanoma	noLA
325	Malignant pleural mesothelioma.	AHS	Alberta Health Services	2012	Government Agency	North America	Canada	H - High income	broad	mesothelioma	SR
326	Guidelines of the European Respiratory Society and the European Society of Thoracic Surgeons for the management of malignant pleural mesothelioma	ERS-ESTS	European Respiratory Society - European Society of Thoracic Surgeons	2010	Professional/specialist Society	Europe	Europe	H - High income	broad	mesothelioma	SR
327	Malignant pleural mesothelioma: ESMO Clinical Practice Guidelines for diagnosis, treatment and follow-up	ESMO	European Society of Medical Oncology	2010	Professional/specialist Society	Europe	Europe	H - High income	broad	mesothelioma	noSR
328	Guidelines for pathologic diagnosis of malignant mesothelioma: 2012 update of the consensus statement from the International Mesothelioma Interest Group	IMIG	International Mesothelioma Interest Group	2013	Independent Expert Panel	international	international (Europe, North America)	H - High income	focused	mesothelioma	noLA
329	Second Italian consensus conference on malignant pleural mesothelioma: state of the art and recommendations	imp	italian multidisciplinary panel	2013	Independent Expert Panel	Europe	Italy	H - High income	broad	mesothelioma	SRnoDT
330	Malignant pleural mesothelioma, version 1.2015	NCCN	National Comprehensive Cancer Network	2015	Professional/specialist Society	North America	USA	H - High income	broad	mesothelioma	noLA
331	Guidelines for the diagnosis and treatment of malignant pleural mesothelioma	NHMRC	National Health and Medical Research Council	2013	Government Agency	Oceania	Australia	H - High income	broad	mesothelioma	SR
332	SEOM guidelines for the treatment of malignant pleural mesothelioma	SEOM	Sociedad Española de Oncología Médica (Spanish Society of Medical Oncology)	2011	Professional/specialist Society	Europe	Spain	H - High income	focused	mesothelioma	noLA
333	Malignant Pleural Effusion	AHS	Alberta Health Services	2014	Government Agency	North America	Canada	H - High income	focused	pleural disease	SR
334	Investigation of a unilateral pleural effusion in adults: British Thoracic Society pleural disease guideline 2010.	BTS	British Thoracic Society	2010	Professional/specialist Society	Europe	UK	H - High income	focused	pleural disease	SR
335	Expert consensus for the management of advanced or metastatic pancreatic neuroendocrine and carcinoid tumors.	nep	NETs expert panel	2015	Independent Expert Panel	international	international (Europe, USA, Argentina)	H - High income	focused	NETs	SRinsDT
336	Recommendations for management of patients with neuroendocrine liver metastases.	WGNLM	Working Group on Neuroendocrine Liver Metastases	2014	Independent Expert Panel	international	international (Europe, USA, China)	H; UM	focused	NETs	SR
337	Guidelines for the diagnosis and management of gastroenteropancreatic neuroendocrine tumours (GEP NETs)	ACN	Australian Cancer Network	2011	Professional/specialist Society	Oceania	Australia	H - High income	broad	NETs	noSR
338	Targeted therapies for well and moderately differentiated unresectable pancreatic neuroendocrine tumours	AHS	Alberta Health Services	2012	Government Agency	North America	Canada	H - High income	focused	NETs	SR
339	Neoplasie neuroendocrine	AIOM-Itanet	Associazione Italiana di Oncologia Medica - Italian Association for Neuroendocrine Tumors	2015	Professional/specialist Society	Europe	Italy	H - High income	broad	NETs	noSR
340	Consensus Recommendations for the Diagnosis and Management of Pancreatic Neuroendocrine Tumors: Guidelines from a Canadian National Expert Group.	CNEG	Canadian National Expert Group	2014	Independent Expert Panel	North America	Canada	H - High income	broad	NETs	noSR
341	Consensus recommendations for the diagnosis and management of well-differentiated gastroenterohepatic neuroendocrine tumours: a revised statement from a Canadian National Expert Group	CNEG	Canadian National Expert Group	2010	Independent Expert Panel	North America	Canada	H - High income	broad	NETs	noSR
342	Pulmonary neuroendocrine (carcinoid) tumors: European Neuroendocrine Tumor Society expert consensus and recommendations for best practice for typical and atypical pulmonary carcinoids.	ENETS	European Neuroendocrine Tumor Society	2015	Professional/specialist Society	Europe	Europe	H - High income	focused	NETs	SRinsDT
343	ENETS Consensus Guidelines for the management of patients with gastroduodenal neoplasms	ENETS	European Neuroendocrine Tumor Society	2012	Professional/specialist Society	Europe	Europe	H - High income	broad	NETs	noSR
344	Neuroendocrine bronchial and thymic tumors: ESMO Clinical Practice Guidelines for diagnosis, treatment and follow-up	ESMO	European Society of Medical Oncology	2012	Professional/specialist Society	Europe	Europe	H - High income	broad	NETs	noSR
345	Adrenal cancer: ESMO Clinical Practice Guidelines for diagnosis, treatment and follow-up	ESMO	European Society of Medical Oncology	2012	Professional/specialist Society	Europe	Europe	H - High income	broad	NETs	noSR
346	Neuroendocrine gastro-entero-pancreatic tumors: ESMO Clinical Practice Guidelines for diagnosis, treatment and follow-up	ESMO	European Society of Medical Oncology	2012	Professional/specialist Society	Europe	Europe	H - High income	broad	NETs	noSR
347	Systemic treatment in unresectable metastatic well-differentiated carcinoid tumors: consensus results from a modified delphi process	GTCP	GEPNET Treatment Consensus Panel	2013	Independent Expert Panel	North America	USA	H - High income	focused	NETs	noSR
348	Neuroendocrine tumors: current recommendations for diagnosis and surgical management	ISIGC-NOLNTG	Inter-Science Institute’s GI council - Louisiana State University Neuroendocrine tumor group	2011	other	North America	USA	H - High income	broad	NETs	noLA
349	Consensus guidelines for the management and treatment of neuroendocrine tumors	NANETS	North American Neuroendocrine Tumor Society	2013	Professional/specialist Society	North America	North America	H - High income	broad	NETs	noLA
350	NANETS consensus guidelines for the diagnosis of neuroendocrine tumor	NANETS	North American Neuroendocrine Tumor Society	2010	Professional/specialist Society	North America	North America	H - High income	broad	NETs	SRnoDT
351	Neuroendocrine tumors, version 1.2015	NCCN	National Comprehensive Cancer Network	2015	Professional/specialist Society	North America	USA	H - High income	broad	NETs	noLA
352	Nordic guidelines 2014 for diagnosis and treatment of gastroenteropancreatic neuroendocrine neoplasms.	NNTG	Nordic Neuroendocrine Tumour Group	2014	Independent Expert Panel	Europe	Scandinavian Countries	H - High income	broad	NETs	noLA
353	Management guidelines for gastrointestinal neuroendocrine neoplasm.	PNNT	Polish Network of Neuroendocrine Tumours	2013	Independent Expert Panel	Europe	Poland	H - High income	broad	NETs	noLA
354	SEOM clinical guidelines for the diagnosis and treatment of gastroenteropancreatic neuroendocrine neoplasms (GEP-NENs) 2014.	SEOM	Sociedad Española de Oncología Médica (Spanish Society of Medical Oncology)	2014	Professional/specialist Society	Europe	Spain	H - High income	broad	NETs	noLA
355	Guidelines for biomarker testing in gastroenteropancreatic neuroendocrine neoplasms: a national consensus of the Spanish Society of Pathology and the Spanish Society of Medical Oncology	SEOM-SEAP	Sociedad Española de Oncología Médica (Spanish Society of Medical Oncology) - Spanish Society of Pathology	2013	Professional/specialist Society	Europe	Spain	H - High income	focused	NETs	noLA
356	Malignant insulinoma: recommendations for characterisation and treatment.	SFE-GETE	Société Française d'Endocrinologie (French Society of Endocrinology ) - Groupe d’étude des tumeurs endocrines	2013	Professional/specialist Society	Europe	France	H - High income	broad	NETs	SRinsDT
357	Pheochromocytoma and paraganglioma: an Endocrine Society clinical practice guideline.	ES	Endocrine Society	2014	Professional/specialist Society	North America	USA	H - High income	focused	NETs	SR
358	Management of adnexal masses.	ACOG	American College of Obstetricians and Gynecologists	2013	Professional/specialist Society	North America	USA	H - High income	focused	ovarian cancer	SRinsDT
359	ACR Appropriateness Criteria clinically suspected adnexal mass.	ACR	American College of Radiology	2012	Professional/specialist Society	North America	USA	H - High income	focused	ovarian cancer	SRinsDT
360	Management of suspected ovarian masses in premenopausal women.	BSGE-RCOG	British Society of Gynaecological Endoscopy - Royal College of Obstetricians and Gynaecologists	2011	Professional/specialist Society	Europe	UK	H - High income	focused	ovarian cancer	SR
361	Management of a suspicious adnexal mass.	CCO	Cancer Care Ontario	2011	Government Agency	North America	Canada	H - High income	focused	ovarian cancer	SR
362	Initial evaluation and referral guidelines for management of pelvic/ovarian masses.	SOGC-GOC-SCC	Society of Obstetricians and Gynaecologists of Canada - Society of Gynecologic Oncologists of Canada - Society of Canadian Colposcopists	2009	Professional/specialist Society	North America	Canada	H - High income	focused	ovarian cancer	SRinsDT
363	Management of asymptomatic ovarian and other adnexal cysts imaged at US: Society of Radiologists in Ultrasound Consensus Conference Statement	SRU	Society of Radiologists in Ultrasound	2010	Professional/specialist Society	North America	USA	H - High income	focused	ovarian cancer	noLA
364	Management of presumed benign ovarian tumors: updated French guidelines.	CNGO	Collège National des Gynécologues Obstétriciens Français (French College of Gynaecologists and Obstetricians)	2014	Professional/specialist Society	Europe	France	H - High income	focused	ovarian cancer	noSR
365	Staging classification for cancer of the ovary, fallopian tube, and peritoneum.	FIGO	International Federation of Gynecology and Obstetrics (FIGO) Committee on Gynecologic Oncology	2014	Professional/specialist Society	international	international (Europe, USA, Argentina, Australia, India, Japan, Lebanon, South Africa)	H; UM; LM	focused	ovarian cancer	noLA
366	Committee Opinion No. 477: the role of the obstetrician-gynecologist in the early detection of epithelial ovarian cancer	ACOG-SGO	American College of Obstetricians and Gynecologists - Society of Gynecologic Oncology	2011	Professional/specialist Society	North America	USA	H - High income	focused	ovarian cancer	noLA
367	ACR Appropriateness Criteria staging and follow-up of ovarian cancer.	ACR	American College of Radiology	2012	Professional/specialist Society	North America	USA	H - High income	focused	ovarian cancer	SRinsDT
368	Epithelial ovarian, fallopian tube, and primary peritoneal cancer.	AHS	Alberta Health Services	2013	Government Agency	North America	Canada	H - High income	broad	ovarian cancer	SR
369	Tumori dell'ovaio	AIOM	Associazione Italiana di Oncologia Medica	2015	Professional/specialist Society	Europe	Italy	H - High income	broad	ovarian cancer	noSR
370	Optimal chemotherapy for recurrent ovarian cancer.	CCO	Cancer Care Ontario	2011	Government Agency	North America	Canada	H - High income	focused	ovarian cancer	SR
371	PET imaging in ovarian cancer: recommendations.	CCO	Cancer Care Ontario	2009	Government Agency	North America	Canada	H - High income	focused	ovarian cancer	SR
372	Recommendations of the Fertility Task Force of the European Society of Gynecologic Oncology about the conservative management of ovarian malignant tumors	ESGO	European Society of Gynaecological Oncology	2011	Professional/specialist Society	Europe	Europe	H - High income	focused	ovarian cancer	SRnoDT
373	Cancer antigen 125: lost to follow-up?: a European society of gynaecological oncology consensus statement	ESGO	European Society of Gynaecological Oncology	2012	Professional/specialist Society	Europe	Europe	H - High income	focused	ovarian cancer	noSR
374	Newly diagnosed and relapsed epithelial ovarian carcinoma: ESMO Clinical Practice Guidelines for diagnosis, treatment and follow-up	ESMO-JSMO	European Society of Medical Oncology - Japanese Society of Medical Oncology	2013	Professional/specialist Society	Europe	Europe	H - High income	broad	ovarian cancer	noSR
375	ESUR guidelines: ovarian cancer staging and follow-up	ESUR	European Society of Urogenital Radiology	2010	Professional/specialist Society	Europe	Europe	H - High income	focused	ovarian cancer	noSR
376	GEICO (Spanish Group for Investigation on Ovarian Cancer) treatment guidelines in ovarian cancer 2012	GEICO	Grupo Español Investigación Cáncer Ovario (Spanish Group for Investigation on Ovarian Cancer)	2013	Professional/specialist Society	Europe	Spain	H - High income	broad	ovarian cancer	noSR
377	S3-Guideline on Diagnostics, Therapy and Follow-up of Malignant Ovarian Tumours: Short version 1.0 - AWMF registration number: 032/035OL, June 2013.	S3 (AWMF-DKH-DKG)	Arbeitsgemeinschaft der wissenschaftlichen medizinischen Fachgesellschaften (Association of the Scientific Medical Societies in Germany) - Deutsche Krebshilfe (German Cancer Aid) - Deutsche Krebsgesellschaft (German Cancer Society)	2013	Professional/specialist Society	Europe	Germany	H - High income	broad	ovarian cancer	noLA
378	Ovarian cancer, version 1.2015	NCCN	National Comprehensive Cancer Network	2015	Professional/specialist Society	North America	USA	H - High income	broad	ovarian cancer	noLA
379	Follow up of women with epithelial ovarian cancer	NHMRC (NBOCC-CA)	National Health and Medical Research Council (National Breast and Ovarian Cancer Centre-Cancer Australia)	2012	Government Agency	Oceania	Australia	H - High income	focused	ovarian cancer	SR
380	Ovarian cancer. The recognition and initial management of ovarian cancer.	NICE	National Institute for Health and Care Excellence (National Collaborating Centre for Cancer)	2011	Government Agency	Europe	UK	H - High income	focused	ovarian cancer	SR
381	SEOM guideline in ovarian cancer 2014.	SEOM(GEICO)	Sociedad Española de Oncología Médica (Spanish Society of Medical Oncology) / Grupo Español Investigación Cáncer Ovario (Spanish Group for Investigation on Ovarian Cancer)	2014	Professional/specialist Society	Europe	Spain	H - High income	broad	ovarian cancer	noLA
382	Epithelial ovarian cancer. A national clinical guideline.	SIGN	Scottish Intercollegiate Guidelines Network	2013	Government Agency	Europe	UK	H - High income	broad	ovarian cancer	SR
383	Ovarian germ cell tumours.	AHS	Alberta Health Services	2013	Government Agency	North America	Canada	H - High income	broad	ovarian cancer	SR
384	Non-epithelial ovarian cancer: ESMO Clinical Practice Guidelines for diagnosis, treatment and follow-up	ESMO	European Society of Medical Oncology	2012	Professional/specialist Society	Europe	Europe	H - High income	broad	ovarian cancer	noSR
385	Italian consensus guidelines for the diagnostic work-up and follow-up of cystic pancreatic neoplasms.	AIGO-AISP	Associazione Italiana Gastroenterologi ed Endoscopisti Digestivi Ospedalieri (Italian Association of Hospital Gastroenterologists and Endoscopists) - Associazione Italiana per lo Studio del Pancreas (Italian Association for the Study of the Pancreas)	2014	Professional/specialist Society	Europe	Italy	H - High income	focused	pancreatic cancer	SR
386	Carcinoma del pancreas esocrino	AIOM	Associazione Italiana di Oncologia Medica	2015	Professional/specialist Society	Europe	Italy	H - High income	broad	pancreatic cancer	noSR
387	Pretreatment assessment of resectable and borderline resectable pancreatic cancer: expert consensus statement	AHPBA-SSO-SSAT	Americas HepatoPancreato-Biliary Association - Society of Surgical Oncology - Society for Surgery of the Alimentary Tract	2009	Professional/specialist Society	North America	USA	H - High income	focused	pancreatic cancer	noLA
388	Adenocarcinoma of the Pancreas	AHS	Alberta Health Services	2014	Government Agency	North America	Canada	H - High income	broad	pancreatic cancer	SRinsDT
389	PET imaging in pancreatic cancer: recommendations.	CCO	Cancer Care Ontario	2009	Government Agency	North America	Canada	H - High income	focused	pancreatic cancer	SR
390	Pancreatic adenocarcinoma: ESMO-ESDO Clinical Practice Guidelines for diagnosis, treatment and follow-up	ESMO-ESDO	European Society of Medical Oncology - European Society of Digestive Oncology	2012	Professional/specialist Society	Europe	Europe	H - High income	broad	pancreatic cancer	noSR
391	When to perform a pancreatoduodenectomy in the absence of positive histology? A consensus statement by the International Study Group of Pancreatic Surgery.	ISGPS	International Study Group of Pancreatic Surgery	2014	Independent Expert Panel	international	international (Europe, USA, India)	H; L	focused	pancreatic cancer	SR
392	Borderline resectable pancreatic cancer: a consensus statement by the International Study Group of Pancreatic Surgery (ISGPS).	ISGPS	International Study Group of Pancreatic Surgery	2014	Independent Expert Panel	international	international (Europe, USA, India)	H; L	focused	pancreatic cancer	SR
393	EBM-based Clinical Guidelines for Pancreatic Cancer (2013) issued by the Japan Pancreas Society: a synopsis.	JPS	Japan Pancreas Society	2014	Professional/specialist Society	Asia	Japan	H - High income	broad	pancreatic cancer	SRinsDT
394	Pancreatic adenocarcinoma, version 2.2015	NCCN	National Comprehensive Cancer Network	2015	Professional/specialist Society	North America	USA	H - High income	broad	pancreatic cancer	noLA
395	Ductal pancreatic adenocarcinoma.	GGPO-S3	German Guideline Program in Oncology	2014	Professional/specialist Society	Europe	Germany	H - High income	broad	pancreatic cancer	SR
396	SEOM clinical guidelines for the treatment of pancreatic cancer	SEOM	Sociedad Española de Oncología Médica (Spanish Society of Medical Oncology)	2011	Professional/specialist Society	Europe	Spain	H - High income	broad	pancreatic cancer	noLA
397	Consensus on the treatment of pancreatic cancer in Spain	sep	spanish expert panel	2009	Independent Expert Panel	Europe	Spain	H - High income	focused	pancreatic cancer	noSR
398	TTD consensus document on the diagnosis and management of exocrine pancreatic cancer.	TTD	Grupo Español de Tratamiento de los Tumores Digestivos	2014	Professional/specialist Society	Europe	Spain	H - High income	broad	pancreatic cancer	noLA
399	Saudi Oncology Society clinical management guideline series. Pancreatic cancer 2014.	SOS	Saudi Oncology Society	2014	Professional/specialist Society	Asia	Saudi	H - High income	broad	pancreatic cancer	noLA
400	International consensus guidelines 2012 for the management of IPMN and MCN of the pancreas	IAP	International Association of Pancreatology	2012	Professional/specialist Society	international	international (Europe, USA, Japan)	H - High income	broad	pancreatic cancer	noLA
401	European experts consensus statement on cystic tumours of the pancreas	ESGCTP	European Study Group on Cystic Tumours of the Pancreas	2013	other	Europe	Europe	H - High income	focused	pancreatic cancer	SRnoDT
402	Screening and diagnosis of prostate cancer in patients with ileal pouch-anal anastomosis: consensus from an expert panel	mcp	multidisciplinary consensus panel	2011	Independent Expert Panel	North America	USA	H - High income	focused	prostatic cancer	SRnoDT
403	Prostate cancer early detection, version 1.2014	NCCN	National Comprehensive Cancer Network	2014	Professional/specialist Society	North America	USA	H - High income	focused	prostatic cancer	noLA
404	The critical role of the pathologist in determining eligibility for active surveillance as a management option in patients with prostate cancer: consensus statement with recommendations supported by the College of American Pathologists, International Society of Urological Pathology, Association of Directors of Anatomic and Surgical Pathology, the New Zealand Society of Pathologists, and the Prost…	CAP-ISUP-ADASP-NZSP-PCF	College of American Pathologists - International Society of Urological Pathology - Association of Directors of Anatomic and Surgical Pathology - New Zealand Society of Pathologists - Prostate Cancer Foundation	2014	Professional/specialist Society	international	international (Europe, North America, Australia, New Zealand)	H - High income	focused	prostatic cancer	noLA
405	Current state of the art, multimodality research and future visions for the treatment of patients with prostate cancer: consensus results from "Challenges and Chances in Prostate Cancer Research Meeting 2013".	DKH	Deutsche Krebshilfe (German Cancer Aid)	2014	other	Europe	Germany	H - High income	focused	prostatic cancer	noLA
406	The Melbourne Consensus Statement on the early detection of prostate cancer.	meg	multidisciplinary expert group	2014	Independent Expert Panel	international	international (Europe, North America, Australia)	H - High income	focused	prostatic cancer	noSR
407	Follow-up modalities in focal therapy for prostate cancer: results from a Delphi consensus project.	mep	multidisciplinary expert panel	2015	Independent Expert Panel	international	international (Europe, North America)	H - High income	focused	prostatic cancer	SRinsDT
408	Challenges and recommendations for early identification of metastatic disease in prostate cancer.	RADAR	Prostate Cancer Radiographic Assessments for Detection of Advanced Recurrence Group	2014	Independent Expert Panel	North America	USA	H - High income	focused	prostatic cancer	SRinsDT
409	American Brachytherapy Society consensus guidelines for transrectal ultrasound-guided permanent prostate brachytherapy	ABS	American Brachytherapy Society	2012	Professional/specialist Society	North America	USA	H - High income	focused	prostatic cancer	noSR
410	American Brachytherapy Society consensus guidelines for high-dose-rate prostate brachytherapy	ABS	American Brachytherapy Society	2012	Professional/specialist Society	North America	USA	H - High income	focused	prostatic cancer	noSR
411	ACR Appropriateness Criteria® prostate cancer—pretreatment detection, staging and surveillance	ACR	American College of Radiology	2012	Professional/specialist Society	North America	USA	H - High income	focused	prostatic cancer	SRinsDT
412	ACR Appropriateness Criteria locally advanced (high-risk) prostate cancer.	ACR	American College of Radiology	2011	Professional/specialist Society	North America	USA	H - High income	focused	prostatic cancer	SRinsDT
413	ACR Appropriateness Criteria post-treatment follow-up of prostate cancer.	ACR	American College of Radiology	2011	Professional/specialist Society	North America	USA	H - High income	focused	prostatic cancer	SRinsDT
414	ACR Appropriateness Criteria® postradical prostatectomy irradiation in prostate cancer.	ACR	American College of Radiology	2014	Professional/specialist Society	North America	USA	H - High income	focused	prostatic cancer	SRinsDT
415	ACR Appropriateness Criteria external beam radiation therapy treatment planning for clinically localized prostate cancer.	ACR	American College of Radiology	2011	Professional/specialist Society	North America	USA	H - High income	focused	prostatic cancer	SRinsDT
416	ACR Appropriateness Criteria® definitive external-beam irradiation in stage T1 and T2 prostate cancer.	ACR	American College of Radiology	2013	Professional/specialist Society	North America	USA	H - High income	focused	prostatic cancer	SRinsDT
417	ACR Appropriateness Criteria® high-dose-rate brachytherapy for prostate cancer.	ACR	American College of Radiology	2013	Professional/specialist Society	North America	USA	H - High income	focused	prostatic cancer	SRinsDT
418	ACR Appropriateness Criteria permanent source brachytherapy for prostate cancer.	ACR	American College of Radiology	2010	Professional/specialist Society	North America	USA	H - High income	focused	prostatic cancer	SRinsDT
419	ACR–ASTRO practice guideline for transperineal permanent brachytherapy of prostate cancer.	ACR-ASTRO	American College of Radiology - American Society for Radiation Oncology	2011	Professional/specialist Society	North America	USA	H - High income	focused	prostatic cancer	noSR
420	American Cancer Society prostate cancer survivorship care guidelines.	ACS	American Cancer Society	2014	Professional/specialist Society	North America	USA	H - High income	focused	prostatic cancer	SR
421	Prostate cancer.	AHS	Alberta Health Services	2013	Government Agency	North America	Canada	H - High income	broad	prostatic cancer	SR
422	Carcinoma della prostata	AIOM	Associazione Italiana di Oncologia Medica	2014	Professional/specialist Society	Europe	Italy	H - High income	broad	prostatic cancer	noSR
423	Management of prostate cancer in Asia: resource-stratified guidelines from the Asian Oncology Summit 2013.	AOS	Asian Oncology Summit	2013	Independent Expert Panel	Asia	Asia (Australia, Indonesia, Japan, Singapore, Thailand)	H; UM; LM	focused	prostatic cancer	SR
424	Prostate cancer survivorship care guideline: american society of clinical oncology clinical practice guideline endorsement	ASCO(AUA)	American Society of Clinical Oncology / American Urological Association	2015	Professional/specialist Society	North America	USA	H - High income	focused	prostatic cancer	SR
425	Adjuvant and salvage radiotherapy after prostatectomy: American Society of Clinical Oncology clinical practice guideline endorsement.	ASCO(AUA)	American Society of Clinical Oncology / American Urological Association	2014	Professional/specialist Society	North America	USA	H - High income	focused	prostatic cancer	SR
426	Adjuvant and Salvage Radiotherapy after Prostatectomy: AUA/ASTRO Guideline	AUA-ASTRO	American Urological Association - American Society for Radiation Oncology	2013	Professional/specialist Society	North America	USA	H - High income	focused	prostatic cancer	SRinsDT
427	Systemic therapy in men with metastatic castration-resistant prostate cancer: American Society of Clinical Oncology and Cancer Care Ontario clinical practice guideline.	ASCO-CCO	American Society of Clinical Oncology - CancerCare Ontario	2014	Professional/specialist Society	North America	USA	H - High income	focused	prostatic cancer	SR
428	Castration-resistant prostate cancer: AUA guideline amendment.	AUA	American Urological Association	2015	Professional/specialist Society	North America	USA	H - High income	focused	prostatic cancer	SR
429	Guideline for the management of clinically localized prostate cancer: 2007 update.	AUA	American Urological Association	2011	Professional/specialist Society	North America	USA	H - High income	focused	prostatic cancer	SR
430	PSA testing for the pretreatment staging and posttreatment management of prostate cancer: 2013 revision of 2009 best practice statement.	AUA	American Urological Association	2013	Professional/specialist Society	North America	USA	H - High income	focused	prostatic cancer	noLA
431	Best practice policy statement on cryosurgery for the treatment of localized prostate cancer.	AUA	American Urological Association	2010	Professional/specialist Society	North America	USA	H - High income	focused	prostatic cancer	SRinsDT
432	Early detection of prostate cancer: AUA guideline.	AUA	American Urological Association	2013	Professional/specialist Society	North America	USA	H - High income	focused	prostatic cancer	SR
433	Low-dose rate brachytherapy for patients with low- or intermediate-risk prostate cancer.	CCO	Cancer Care Ontario	2012	Government Agency	North America	Canada	H - High income	focused	prostatic cancer	SR
434	Adjuvant radiotherapy following radical prostatectomy for pathologic T3 or margin-positive prostate cancer.	CCO	Cancer Care Ontario	2014	Government Agency	North America	Canada	H - High income	focused	prostatic cancer	SR
435	Guideline for optimization of surgical and pathological quality performance for radical prostatectomy in prostate cancer management: evidentiary base	CCO	Cancer Care Ontario	2014	Government Agency	North America	Canada	H - High income	focused	prostatic cancer	SR
436	Referral of Suspected Prostate Cancer by Family Physicians and Other Primary Care Providers	CCO	Cancer Care Ontario	2012	Government Agency	North America	Canada	H - High income	focused	prostatic cancer	SR
437	Active Surveillance for the Management of Localized Prostate Cancer	CCO	Cancer Care Ontario	2014	Government Agency	North America	Canada	H - High income	focused	prostatic cancer	SR
438	CUA-CUOG guidelines for the management of castration-resistant prostate cancer (CRPC): 2013 update.	CUA-CUOG	Canadian Urological Association - Canadian Urologic Oncology Group	2013	Professional/specialist Society	North America	Canada	H - High income	focused	prostatic cancer	SRinsDT
439	guidelines on prostate cancer	EAU	European Association of Urology	2015	Professional/specialist Society	Europe	Europe	H - High income	broad	prostatic cancer	SR
440	Transrectal ultrasound guided biopsy of the prostate.	EAUN	European Association of Urology Nurses	2011	Professional/specialist Society	Europe	Europe	H - High income	focused	prostatic cancer	SR
441	Optimal management of metastatic castration-resistant prostate cancer: highlights from a European Expert Consensus Panel.	EECP	European Expert Consensus Panel	2014	Independent Expert Panel	Europe	Europe	H - High income	focused	prostatic cancer	noLA
442	Recommendations from the EGAPP Working Group: does PCA3 testing for the diagnosis and management of prostate cancer improve patient health outcomes?	EGAPPWG	EGAPP Working Group	2014	Independent Expert Panel	Europe	Europe	H - High income	focused	prostatic cancer	SR
443	Prostate cancer: ESMO Consensus Conference Guidelines 2012	ESMO	European Society of Medical Oncology	2013	Professional/specialist Society	Europe	Europe	H - High income	broad	prostatic cancer	noSR
444	Prostate cancer: ESMO Clinical Practice Guidelines for diagnosis, treatment and follow-up	ESMO-JSMO	European Society of Medical Oncology - Japanese Society of Medical Oncology	2013	Professional/specialist Society	Europe	Europe	H - High income	broad	prostatic cancer	noSR
445	ESUR prostate MR guidelines 2012	ESUR	European Society of Urogenital Radiology	2012	Professional/specialist Society	Europe	Europe	H - High income	focused	prostatic cancer	noLA
446	GEC/ESTRO recommendations on high dose rate afterloading brachytherapy for localised prostate cancer: An update	GEC-ESTRO	Groupe Européen de Curiethérapie (European Brachytherapy Group) - European SocieTy for Radiotherapy & Oncology	2013	Professional/specialist Society	Europe	Europe	H - High income	focused	prostatic cancer	noLA
447	Report of a consensus meeting on focal low dose rate brachytherapy for prostate cancer	icp	international consensus panel	2012	Independent Expert Panel	international	international (Europe, USA)	H - High income	focused	prostatic cancer	noSR
448	Focal therapy in prostate cancer-report from a consensus panel	ipe (EAU-EORTC-ESTRO-SUO)	international panel of expert (European Organization for Research and Treatment of CancerGenitourinary - European Association of Urology - European Society for Therapeutic Radiology and Oncology - Society of Urologic Oncology)	2010	Independent Expert Panel	international	international (Europe, North America)	H - High income	focused	prostatic cancer	noLA
449	Cryoablation of the prostate: technical recommendations	iwg	international working group	2009	Independent Expert Panel	Europe	Europe	H - High income	focused	prostatic cancer	noLA
450	Androgen deprivation therapy for prostate cancer: recommendations to improve patient and partner quality of life	mwg	multidisciplinary working group	2010	Independent Expert Panel	North America	North America	H - High income	focused	prostatic cancer	noSR
451	Guidelines on management of prostate cancer	mwg	multidisciplinary working group	2013	Independent Expert Panel	Asia	Singapore	H - High income	broad	prostatic cancer	SRnoDT
452	Prostate cancer, version 1.2015	NCCN	National Comprehensive Cancer Network	2015	Professional/specialist Society	North America	USA	H - High income	broad	prostatic cancer	noLA
453	Prostate cancer: diagnosis and treatment.	NICE	National Institute for Health and Care Excellence (National Collaborating Centre for Cancer)	2014	Government Agency	Europe	UK	H - High income	broad	prostatic cancer	SR
454	Diagnosing prostate cancer: PROGENSA PCA3 assay and Prostate Health Index	NICE	National Institute for Health and Care Excellence	2015	Government Agency	Europe	UK	H - High income	focused	prostatic cancer	SR
455	Update of evidence for prostate-specific antigen (PSA) testing in asymptomatic men	NZGG	New Zealand Guidelines Group	2009	other	Oceania	New Zealand	H - High income	focused	prostatic cancer	noLA
456	Magnetic resonance imaging for the detection, localisation, and characterisation of prostate cancer: recommendations from a European consensus meeting	PCPM	PREDICT Consensus Panel Members	2011	Independent Expert Panel	Europe	Europe	H - High income	focused	prostatic cancer	noLA
457	Australian & New Zealand Faculty of Radiation Oncology Genito-Urinary Group: 2010 consensus guidelines for definitive external beam radiotherapy for prostate carcinoma	FROGG	Faculty of Radiation Oncology Genito-Urinary Group	2010	Professional/specialist Society	Oceania	Australia	H - High income	focused	prostatic cancer	noSR
458	SEOM clinical guidelines for treatment of prostate cancer	SEOM	Sociedad Española de Oncología Médica (Spanish Society of Medical Oncology)	2012	Professional/specialist Society	Europe	Spain	H - High income	focused	prostatic cancer	noLA
459	ITALIAN PROSTATE BIOPSIES GROUP: UPDATED GUIDELINES’ COMPENDIUM	SIUrO	Società Italiana Urologia Oncologica	2013	Professional/specialist Society	Europe	Italy	H - High income	focused	prostatic cancer	SRinsDT
460	Recommendations from the Spanish Oncology Genitourinary Group for the treatment of patients with metastatic castration-resistant prostate cancer	SOGUG	Grupo Español de Tumores Genitourinarios (Spanish Oncology Genitourinary Group)	2012	Professional/specialist Society	Europe	Spain	H - High income	focused	prostatic cancer	SR
461	Saudi oncology society and Saudi urology association combined clinical management guidelines for prostate cancer.	SOS-SUA	Saudi Oncology Society - Saudi Urology Association	2014	Professional/specialist Society	Asia	Saudi	H - High income	broad	prostatic cancer	noLA
462	Saudi Oncology Society clinical management guidelines for prostate cancer	SOS	Saudi Oncology Society	2011	Professional/specialist Society	Asia	Saudi	H - High income	broad	prostatic cancer	noLA
463	Transatlantic Consensus Group on active surveillance and focal therapy for prostate cancer	TCG	Transatlantic Consensus Group	2012	Independent Expert Panel	international	international (Europe, North America)	H - High income	focused	prostatic cancer	noLA
464	Clinical practice guidelines for the Management of locally advanced and metastatic prostate cancer	ACN	Australian Cancer Network	2010	Professional/specialist Society	Oceania	Australia	H - High income	focused	prostatic cancer	SRinsDT
465	SEOM Clinical guidelines for the treatment of metastatic prostate cancer	SEOM	Sociedad Española de Oncología Médica (Spanish Society of Medical Oncology)	2014	Professional/specialist Society	Europe	Spain	H - High income	focused	prostatic cancer	noLA
466	Management of patients with advanced prostate cancer: Recommendations of the St.Gallen Advanced Prostate Cancer Consensus Conference (APCCC) 2015.	SONK	St.Gallen Oncology Conferences	2015	other	Europe	Europe	H - High income	focused	prostatic cancer	noSR
467	Management of prostate cancer in older patients: updated recommendations of a working group of the International Society of Geriatric Oncology.	SIOG	Société Internationale d’Oncologie Gériatrique (International Society of Geriatric Oncology)	2014	Professional/specialist Society	international	international (Europe, North America)	H - High income	focused	prostatic cancer	SR
468	Focal therapy: patients, interventions, and outcomes--a report from a consensus meeting.	icp	international consensus panel	2015	Independent Expert Panel	international	international (Europe, USA)	H - High income	focused	prostatic cancer	noLA
469	Multidisciplinary consensus: a practical guide for the integration of abiraterone into clinical practice.	mep	multidisciplinary expert panel	2014	Independent Expert Panel	Oceania	Australia	H - High income	focused	prostatic cancer	noSR
470	Small renal mass biopsy--how, what and when: report from an international consensus panel.	mep	multidisciplinary expert panel	2014	Independent Expert Panel	international	international (Europe, USA)	H - High income	focused	renal cancer	noSR
471	Recommendations for the clinical and radiological evaluation of response to treatment in metastatic renal cell cancer.	mep	multidisciplinary expert panel	2014	Independent Expert Panel	Europe	Spain	H - High income	focused	renal cancer	noSR
472	Treatment algorithm for metastatic renal cell carcinoma--recommendations based on evidence and clinical practice.	mep	multidisciplinary expert panel	2014	Independent Expert Panel	Europe	Germany	H - High income	focused	renal cancer	noSR
473	Renal cell carcinoma. Nation-wide guideline	ACCC	Association of Comprehensive Cancer Centres	2012	Professional/specialist Society	Europe	Netherlands	H - High income	broad	renal cancer	SR
474	ACR Appropriateness Criteria renal cell carcinoma staging.	ACR	American College of Radiology	2011	Professional/specialist Society	North America	USA	H - High income	focused	renal cancer	SRinsDT
475	ACR Appropriateness Criteria® post-treatment follow-up of renal cell carcinoma.	ACR	American College of Radiology	2013	Professional/specialist Society	North America	USA	H - High income	focused	renal cancer	SRinsDT
476	ACR Appropriateness Criteria® indeterminate renal mass.	ACR	American College of Radiology	2014	Professional/specialist Society	North America	USA	H - High income	focused	renal cancer	SRinsDT
477	Renal cell carcinoma.	AHS	Alberta Health Services	2012	Government Agency	North America	Canada	H - High income	broad	renal cancer	SR
478	Tumori del rene	AIOM	Associazione Italiana di Oncologia Medica	2015	Professional/specialist Society	Europe	Italy	H - High income	broad	renal cancer	noSR
479	Follow-up for clinically localized renal neoplasms: AUA guideline.	AUA	American Urological Association	2013	Professional/specialist Society	North America	USA	H - High income	focused	renal cancer	SR
480	Guideline for management of the clinical stage 1 renal mass.	AUA	American Urological Association	2009	Professional/specialist Society	North America	USA	H - High income	focused	renal cancer	SRinsDT
481	Guidelines on renal cell carcinoma	EAU	European Association of Urology	2015	Professional/specialist Society	Europe	Europe	H - High income	broad	renal cancer	SR
482	Renal cell carcinoma: ESMO Clinical Practice Guidelines for diagnosis, treatment and follow-up.	ESMO	European Society of Medical Oncology	2014	Professional/specialist Society	Europe	Europe	H - High income	broad	renal cancer	noSR
483	ICUD-EAU International Consultation on Kidney Cancer 2010	ICUD-EAU	International Consultation on Urological Diseases - European Association of Urology	2011	other	international	international (Europe, North America, China, India, Japan, Korea, Singapore)	H; UM; LM	broad	renal cancer	SRinsDT
484	Advances in renal neoplasia: recommendations from the 2012 International Society of Urological Pathology Consensus Conference.	ISUP	International Society of Urological Pathology	2014	Professional/specialist Society	international	international (Europe, North America, Australia, New Zealand, Asia, South America, Middle East)	H; UM	focused	renal cancer	noSR
485	Evidence-based clinical practice guideline for renal cell carcinoma: the Japanese Urological Association 2011 update	JUA	Japanese Urological Association	2012	Professional/specialist Society	Asia	Japan	H - High income	broad	renal cancer	noLA
486	Management of advanced kidney cancer: Canadian Kidney Cancer Forum 2013 Consensus Update: Canadian Kidney Cancer Forum 2013.	KCRNC	Kidney Cancer Research Network of Canada	2013	Professional/specialist Society	North America	Canada	H - High income	focused	renal cancer	noLA
487	Kidney cancer, version 3.2015	NCCN	National Comprehensive Cancer Network	2015	Professional/specialist Society	North America	USA	H - High income	broad	renal cancer	noLA
488	SEOM clinical guidelines for the treatment of renal cell carcinoma.	SEOM	Sociedad Española de Oncología Médica (Spanish Society of Medical Oncology)	2014	Professional/specialist Society	Europe	Spain	H - High income	focused	renal cancer	noLA
489	Management of adults with Wilms' tumor: recommendations based on international consensus	SIOP-COG	Society of Paediatric Oncology - Children's Oncology Group	2011	Professional/specialist Society	international	international (Europe, USA)	H - High income	focused	renal cancer	SR
490	Recommendations from the Spanish Oncology Genitourinary Group for the treatment of patients with renal cell carcinoma.	SOGUG	Grupo Español de Tumores Genitourinarios (Spanish Oncology Genitourinary Group)	2014	Professional/specialist Society	Europe	Spain	H - High income	focused	renal cancer	SR
491	Saudi oncology society and Saudi urology association combined clinical management guidelines for renal cell carcinoma.	SOS-SUA	Saudi Oncology Society - Saudi Urology Association	2014	Professional/specialist Society	Asia	Saudi	H - High income	focused	renal cancer	noLA
492	UK guidelines for the systemic treatment of renal cell carcinoma	ugc	UK Guideline Committee	2009	Independent Expert Panel	Europe	UK	H - High income	focused	renal cancer	noLA
493	American Society of Clinical Oncology clinical practice guideline on uses of serum tumor markers in adult males with germ cell tumors.	ASCO	American Society of Clinical Oncology	2010	Professional/specialist Society	North America	USA	H - High income	focused	germ cell tumor	SR
494	Maintaining success, reducing treatment burden, focusing on survivorship: highlights from the third European consensus conference on diagnosis and treatment of germ-cell cancer	EGCCCG	European Germ-Cell Cancer Consensus Group	2013	Independent Expert Panel	Europe	Europe	H - High income	broad	germ cell tumor	noSR
495	SEOM guidelines: non-seminomatous germ cell cancer (NSGCC)	SEOM	Sociedad Española de Oncología Médica (Spanish Society of Medical Oncology)	2011	Professional/specialist Society	Europe	Spain	H - High income	broad	germ cell tumor	noLA
496	Testicular cancer	ICUD-SIU	International Consultation on Urological Diseases - Société Internationale d’Urologie	2009	other	international	international (Europe, North America, Australia, Japan)	H - High income	broad	testicular cancer	noSR
498	ACR Appropriateness Criteria staging of testicular malignancy.	ACR	American College of Radiology	2012	Professional/specialist Society	North America	USA	H - High income	focused	testicular cancer	SRinsDT
499	Testicular germ cell tumours.	AHS	Alberta Health Services	2013	Government Agency	North America	Canada	H - High income	broad	testicular cancer	SR
500	Tumore del testicolo	AIOM	Associazione Italiana di Oncologia Medica	2015	Professional/specialist Society	Europe	Italy	H - High income	broad	testicular cancer	noSR
501	Canadian consensus guidelines for the management of testicular germ cell cancer	ccg	canadian consensus group	2010	Independent Expert Panel	North America	Canada	H - High income	broad	testicular cancer	noSR
502	PET imaging in testicular cancer: recommendations.	CCO	Cancer Care Ontario	2009	Government Agency	North America	Canada	H - High income	focused	testicular cancer	SR
503	Management of stage I seminoma	CCO	Cancer Care Ontario	2014	Government Agency	North America	Canada	H - High income	focused	testicular cancer	SR
504	Guidelines on Testicular Cancer	EAU	European Association of Urology	2015	Professional/specialist Society	Europe	Europe	H - High income	broad	testicular cancer	SRnoDT
505	Testicular seminoma and non-seminoma: ESMO Clinical Practice Guidelines for diagnosis, treatment and follow-up.	ESMO	European Society of Medical Oncology	2013	Professional/specialist Society	Europe	Europe	H - High income	broad	testicular cancer	noSR
506	Interdisciplinary evidence-based recommendations for the follow-up of testicular cancer patients: a joint effort	mep	multidisciplinary expert panel	2010	Independent Expert Panel	international	international (Europe)	H - High income	focused	testicular cancer	noSR
507	Testicular cancer, version 1.2015	NCCN	National Comprehensive Cancer Network	2015	Professional/specialist Society	North America	USA	H - High income	broad	testicular cancer	noLA
508	SEOM clinical guidelines for diagnosis and treatment of testicular seminoma (2010)	SEOM	Sociedad Española de Oncología Médica (Spanish Society of Medical Oncology)	2011	Professional/specialist Society	Europe	Spain	H - High income	broad	testicular cancer	noLA
509	Management of adult testicular germ cell tumours	SIGN	Scottish Intercollegiate Guidelines Network	2011	Government Agency	Europe	UK	H - High income	broad	testicular cancer	SR
510	Saudi oncology society and Saudi urology association combined clinical management guidelines for testicular germ cell tumors	SOS-SUA	Saudi Oncology Society - Saudi Urology Association	2014	Professional/specialist Society	Asia	Saudi	H - High income	broad	testicular cancer	noLA
511	2013 European thyroid association guidelines for cervical ultrasound scan and ultrasound-guided techniques in the postoperative management of patients with thyroid cancer.	ETA	European Thyroid Association	2013	Professional/specialist Society	Europe	Europe	H - High income	focused	thyroid cancer	SRinsDT
512	Thyroid Carcinoma	ACR	American College of Radiology	2013	Professional/specialist Society	North America	USA	H - High income	focused	thyroid cancer	SRinsDT
513	Guidelines for the management of thyroid cancer.	BTA	British Thyroid Association	2014	Professional/specialist Society	Europe	UK	H - High income	broad	thyroid cancer	SR
514	German Association of Endocrine Surgeons practice guideline for the surgical management of malignant thyroid tumors	CAEK	Chirurgische Arbeitsgemeinschaft Endokrinologie (German Association of Endocrine Surgeons)	2013	Professional/specialist Society	Europe	Germany	H - High income	focused	thyroid cancer	noSR
515	Thyroid cancer: ESMO Clinical Practice Guidelines for diagnosis, treatment and follow-up	ESMO	European Society of Medical Oncology	2012	Professional/specialist Society	Europe	Europe	H - High income	broad	thyroid cancer	noSR
516	Thyroid carcinoma, version 2.2015	NCCN	National Comprehensive Cancer Network	2014	Professional/specialist Society	North America	USA	H - High income	broad	thyroid cancer	noLA
517	Thyroid cancer: SEOM clinical guidelines.	SEOM	Sociedad Española de Oncología Médica (Spanish Society of Medical Oncology)	2014	Professional/specialist Society	Europe	Spain	H - High income	broad	thyroid cancer	SR
518	Revised American Thyroid Association management guidelines for patients with thyroid nodules and differentiated thyroid cancer.	ATA	American Thyroid Association	2009	Professional/specialist Society	North America	USA	H - High income	broad	thyroid cancer	SR
519	Thyroglobulin measurement using highly sensitive assays in patients with differentiated thyroid cancer: a clinical position paper.	mep	multidisciplinary expert panel	2014	Independent Expert Panel	international	international (Europe)	H - High income	focused	thyroid cancer	noSR
520	Management of invasive well-differentiated thyroid cancer: an American Head and Neck Society consensus statement. AHNS consensus statement.	AHNS	American Head and Neck Society	2014	Professional/specialist Society	North America	USA	H - High income	focused	thyroid cancer	SR
521	Multifocal papillary thyroid carcinoma--a consensus report of the European Society of Endocrine Surgeons (ESES).	ESES	European Society of Endocrine Surgeons	2014	Professional/specialist Society	Europe	Europe	H - High income	focused	thyroid cancer	noSR
522	Recommendations of the Latin American Thyroid Society on diagnosis and management of differentiated thyroid cancer	LATS	Latin American Thyroid Society	2009	Professional/specialist Society	South America	Latin America (Argentina, Brasil, Chile, Perú)	H; UM	broad	thyroid cancer	noSR
523	Thyroid nodules and differentiated thyroid cancer: update on the Brazilian consensus	mcp	multidisciplinary consensus panel	2013	Independent Expert Panel	South America	Brasil	UM - Upper middle income	broad	thyroid cancer	SRinsDT
524	Clinical guideline for management of patients with low risk differentiated thyroid carcinoma.	SEEN	Sociedad Española de Endocrinología y Nutrición (Spanish Society of Endocrinology and Nutrition)	2015	Professional/specialist Society	Europe	Spain	H - High income	focused	thyroid cancer	noLA
525	French ENT Society (SFORL) practice guidelines for lymph-node management in adult differentiated thyroid carcinoma	SFORL	Société Française d'ORL et de Chirurgie de la Face et du Cou (French Society of Otorhinolaryngology)	2012	Professional/specialist Society	Europe	France	H - High income	focused	thyroid cancer	noLA
526	American Association of Clinical Endocrinologists, Associazione Medici Endocrinologi, and European Thyroid Association medical guidelines for clinical practice for the diagnosis and management of thyroid nodules.	AACE-AME-ETAM	American Association of Clinical Endocrinologists - Associazione Medici Endocrinologi - European Thyroid Association	2010	Professional/specialist Society	international	international (Europe, USA)	H - High income	focused	thyroid cancer	SR
527	Endocrine Society of India management guidelines for patients with thyroid nodules: A position statement	ESI	Endocrine Society of India	2011	Professional/specialist Society	Asia	India	LM - Lower middle income	focused	thyroid cancer	noSR
528	Latin American thyroid society recommendations for the management of thyroid nodules	LATS	Latin American Thyroid Society	2009	Professional/specialist Society	South America	Latin America (Argentina, Brasil, Chile, Perú)	H; UM	focused	thyroid cancer	noLA
529	Guidelines of the French society of endocrinology for the management of thyroid nodules	SFE	Société Française d'Endocrinologie (French Society of Endocrinology )	2011	Professional/specialist Society		France	H - High income	broad	thyroid cancer	noLA
530	Targeted therapy for locally advanced unresectable or metastatic medullary thyroid carcinoma.	AHS	Alberta Health Services	2012	Government Agency	North America	Canada	H - High income	focused	thyroid cancer	SR
531	Revised american thyroid association guidelines for the management of medullary thyroid carcinoma.	ATA	American Thyroid Association	2015	Professional/specialist Society	North America	USA	H - High income	broad	thyroid cancer	SR
532	Diagnosis, treatment, and follow-up of medullary thyroid carcinoma: recommendations by the Thyroid Department of the Brazilian Society of Endocrinology and Metabolism.	SBEM	Sociedade Brasileira de Endocrinologia e Metabologia (Brazilian Society of Endocrinology and Metabolism)	2014	Professional/specialist Society	South America	Brasil	UM - Upper middle income	broad	thyroid cancer	SRinsDT
533	Consensus on the management of advanced medullary thyroid carcinoma on behalf of the Working Group of Thyroid Cancer of the Spanish Society of Endocrinology (SEEN) and the Spanish Task Force Group for Orphan and Infrequent Tumors (GETHI).	SEEN-GETHI	Sociedad Española de Endocrinología y Nutrición (Spanish Society of Endocrinology) - Grupo Español de Enfermedades Huérfanas e Infrecuentes (Spanish Task Force Group for Orphan and Infrequent Tumors)	2015	Professional/specialist Society	Europe	Spain	H - High income	focused	thyroid cancer	SRinsDT
534	Spanish consensus for the management of patients with anaplastic cell thyroid carcinoma.	SEEN-GETHI	Sociedad Española de Endocrinología y Nutrición (Spanish Society of Endocrinology) - Grupo Español de Enfermedades Huérfanas e Infrecuentes (Spanish Task Force Group for Orphan and Infrequent Tumors)	2015	Professional/specialist Society	Europe	Spain	H - High income	broad	thyroid cancer	SRinsDT
535	American Thyroid Association guidelines for management of patients with anaplastic thyroid cancer.	ATA	American Thyroid Association	2012	Professional/specialist Society	North America	USA	H - High income	broad	thyroid cancer	SRinsDT
536	Cancers of unknown primary site: ESMO Clinical Practice Guidelines for diagnosis, treatment and follow-up	ESMO	European Society of Medical Oncology	2011	Professional/specialist Society	Europe	Europe	H - High income	broad	unknown primary site	noSR
537	Occult primary, version 1.2015	NCCN	National Comprehensive Cancer Network	2014	Professional/specialist Society	North America	USA	H - High income	broad	unknown primary site	noLA
538	Diagnosis and management of metastatic malignant disease of unknown primary origin.	NICE	National Institute for Health and Care Excellence (National Collaborating Centre for Cancer)	2010	Government Agency	Europe	UK	H - High income	focused	unknown primary site	SR
539	SEOM: cancer of unknown primary site.	SEOM	Sociedad Española de Oncología Médica (Spanish Society of Medical Oncology)	2014	Professional/specialist Society	Europe	Spain	H - High income	broad	unknown primary site	noLA
540	Extragonadal Germ Cell Tumours	AHS	Alberta Health Services	2013	Government Agency	North America	Canada	H - High income	focused	other	SR
541	Managing incidental findings on abdominal CT: white paper of the ACR incidental findings committee	ACR	American College of Radiology	2010	Professional/specialist Society	North America	USA	H - High income	focused	incidentaloma	noLA
542	American Association of Clinical Endocrinologists and American Association of Endocrine Surgeons medical guidelines for the management of adrenal incidentalomas.	AACE-AAES	American Association of Clinical Endocrinologists - American Association of Endocrine Surgeons	2009	Professional/specialist Society	North America	USA	H - High income	focused	incidentaloma	noLA
543	ACR Appropriateness Criteria incidentally discovered adrenal mass.	ACR	American College of Radiology	2012	Professional/specialist Society	North America	USA	H - High income	focused	incidentaloma	SRinsDT
544	AME position statement on adrenal incidentaloma	AME	Associazione Medici Endocrinologi (Italian Association of Clinical Endocrinologists)	2011	Professional/specialist Society	Europe	Italy	H - High income	focused	incidentaloma	SRinsDT
545	Pituitary incidentaloma: an Endocrine Society clinical practice guideline.	ES	Endocrine society	2011	Professional/specialist Society	North America	USA	H - High income	focused	incidentaloma	SR
546	ACR Appropriateness Criteria® anal cancer.	ACR	American College of Radiology	2013	Professional/specialist Society	North America	USA	H - High income	broad	anal cancer	SRinsDT
547	Anal Canal Cancer	AHS	Alberta Health Services	2013	Government Agency	North America	Canada	H - High income	broad	anal cancer	SRinsDT
548	Practice parameters for anal squamous neoplasms.	ASCRS	American Society of Colon and Rectal Surgeons	2012	Professional/specialist Society	North America	USA	H - High income	broad	anal cancer	SR
549	Management of squamous cell cancer of the anal canal: guideline recommendations.	CCO	Cancer Care Ontario	2014	Government Agency	North America	Canada	H - High income	focused	anal cancer	SR
550	Anal cancer: ESMO-ESSO-ESTRO Clinical Practice Guidelines for diagnosis, treatment and follow-up.	ESMO-ESSO-ESTRO	European Society of Medical Oncology - European Society of Surgical Oncology - European SocieTy for Radiotherapy & Oncology	2014	Professional/specialist Society	Europe	Europe	H - High income	broad	anal cancer	noSR
551	Anal Carcinoma, version 2.2015	NCCN	National Comprehensive Cancer Network	2014	Professional/specialist Society	North America	USA	H - High income	broad	anal cancer	noLA
552	SEOM clinical guidelines for the treatment of anal cancer	SEOM	Sociedad Española de Oncología Médica (Spanish Society of Medical Oncology)	2011	Professional/specialist Society	Europe	Spain	H - High income	focused	anal cancer	noLA
553	The treatment of squamous anal carcinoma: guidelines of the Italian Society of Colo-Rectal Surgery	SICCR	Società Italiana di Chirurgia Colorettale	2013	Professional/specialist Society	Europe	Italy	H - High income	focused	anal cancer	SR
554	Saudi Oncology Society clinical management guideline series. Anal canal cancer 2014.	SOS	Saudi Oncology Society	2014	Professional/specialist Society	Asia	Saudi	H - High income	broad	anal cancer	SRinsDT
555	Paraneoplastic neurological syndromes.	EFNS	European Federation of Neurological Societies	2011	Professional/specialist Society	Europe	Europe	H - High income	focused	other	SR
556	ACR Appropriateness Criteria metastatic bone disease.	ACR	American College of Radiology	2012	Professional/specialist Society	North America	USA	H - High income	focused	metastatic ab initio	SRinsDT
557	ACR Appropriateness Criteria® palpable abdominal mass.	ACR	American College of Radiology	2014	Professional/specialist Society	North America	USA	H - High income	focused	other	SR
558	Penile cancer.	AHS	Alberta Health Services	2012	Government Agency	North America	Canada	H - High income	broad	penile cancer	SR
559	EAU guidelines on penile cancer: 2014 update.	EAU	European Association of Urology	2015	Professional/specialist Society	Europe	Europe	H - High income	broad	penile cancer	SRinsDT
560	Penile cancer: ESMO Clinical Practice Guidelines for diagnosis, treatment and follow-up.	ESMO	European Society of Medical Oncology	2013	Professional/specialist Society	Europe	Europe	H - High income	broad	penile cancer	noSR
561	Prognostic factors in penile cancer	ICUD-SIU	International Consultation on Urological Diseases - Société Internationale d’Urologie	2010	other	international	international (Europe, USA)	H - High income	focused	penile cancer	SRinsDT
562	Penile cancer, version 3.2015	NCCN	National Comprehensive Cancer Network	2015	Professional/specialist Society	North America	USA	H - High income	broad	penile cancer	noLA
563	Linee guida multidisciplinari AIOCC-AIRO-AIOM: TUMORI DELLA TESTA E COLLO Algoritmi diagnostico-terapeutici versione 2 (aprile) 2012	AIOCC-AIRO-AIOM	Associazione Italiana di Oncologia Cervico Cefalica - Associazione Italiana Radioterapia Oncologica - Associazione Italiana Oncologia Medica	2012	Professional/specialist Society	Europe	Italy	H - High income	broad	multiple cancer	noLA
564	Referral guidelines for suspected cancer	NICE	National Institute for Health and Care Excellence (National Collaborating Centre for Cancer)	2015	Government Agency	Europe	UK	H - High income	focused	multiple cancer	SR
565	Suspected cancer in primary care: guidelines for investigation, referral and reducing ethnic disparities.	NZGG	New Zealand Guidelines Group	2009	other	Oceania	New Zealand	H - High income	focused	multiple cancer	SRinsDT
566	Tumor markers in colorectal cancer, gastric cancer and gastrointestinal stromal cancers: European group on tumor markers (EGTM) 2013 guidelines update	EGTM	European Group on Tumor Markers	2013	Independent Expert Panel	Europe	Europe	H - High income	focused	multiple cancer	noSR
567	Laboratory medicine practice guidelines: use of tumor markers in liver, bladder, cervical, and gastric cancers.	NACB	National Academy of Clinical Biochemistry	2010	Professional/specialist Society	international	international (Europe, North America, Japan)	H - High income	focused	multiple cancer	noSR
568	Clinical practice considerations. In: Laboratory medicine practice guidelines: guidelines and recommendations for laboratory analysis and application of pharmacogenetics to clinical practice.	NACB	National Academy of Clinical Biochemistry	2010	Professional/specialist Society	international	international (Germany, North America)	H - High income	focused	multiple cancer	noLA
569	SEOM clinical guidelines for using molecular markers in clinical practice	SEOM	Sociedad Española de Oncología Médica (Spanish Society of Medical Oncology)	2011	Professional/specialist Society	Europe	Spain	H - High income	focused	multiple cancer	noLA
570	New response evaluation criteria in solid tumours: revised RECIST guideline (version 1.1)	RECIST	RECIST Working Group	2009	Professional/specialist Society	Europe	Europe	H - High income	focused	multiple cancer	noLA
571	Tumori dell'anziano	AIOM	Associazione Italiana di Oncologia Medica	2014	Professional/specialist Society	Europe	Italy	H - High income	broad	multiple cancer	noSR
572	Senior adult oncology, version 2.2014: clinical practice guidelines in oncology.	NCCN	National Comprehensive Cancer Network	2014	Professional/specialist Society	North America	USA	H - High income	broad	multiple cancer	noLA
573	Survivorship: introduction and definition. Clinical practice guidelines in oncology.	NCCN	National Comprehensive Cancer Network	2014	Professional/specialist Society	North America	USA	H - High income	focused	multiple cancer	noLA
574	La Radioterapia dei Tumori Gastrointestinali: Indicazioni e Criteri Guida	AIRO	Associazione Italiana di Radioterapia Oncologica	2012	Professional/specialist Society	Europe	Italy	H - High income	focused	multiple cancer	noLA
575	Guidelines for urological laparoscopic surgery	JSEE	Japanese Society of Endourology and ESWL	2009	Professional/specialist Society	Asia	Japan	H - High income	focused	multiple cancer	SRinsDT
576	Highlights of the EORTC St. Gallen International Expert Consensus on the primary therapy of gastric, gastroesophageal and oesophageal cancer - differential treatment strategies for subtypes of early gastroesophageal cancer	SONK-EORTC	St.Gallen Oncology Conferences - European Organisation for Research and Treatment of Cancer	2012	other	Europe	Europe	H - High income	focused	multiple cancer	noSR
577	Guidelines for the management of oesophageal and gastric cancer	BSG-AUGIS-BASO	British Society of Gastroenterology - Association of Upper Gastrointestinal Surgeons of Great Britain and Ireland - British Association of Surgical Oncology	2011	Professional/specialist Society	Europe	UK	H - High income	broad	multiple cancer	SRinsDT
578	Report from the 13th annual Western canadian gastrointestinal cancer consensus conference; calgary, alberta; september 8-10, 2011	mcp	multidisciplinary consensus panel	2012	Independent Expert Panel	North America	Canada	H - High income	focused	multiple cancer	noSR
579	linee guida per la gestione integrata del paziente con tumore polmonare	AIOT	Associazione Italiana Oncologia Toracica	2013	Professional/specialist Society	Europe	Italy	H - High income	focused	multiple cancer	noLA
580	Gynecologic Cancer InterGroup (GCIG) consensus review for ovarian tumors of low malignant potential (borderline ovarian tumors).	GCIG	Gynecologic Cancer InterGroup	2014	Independent Expert Panel	international	international (Europe, North America, Australia, South Korea)	H - High income	focused	ovarian cancer	noLA
581	Neoplasie dell'utero: endometrio e cervice	AIOM	Associazione Italiana di Oncologia Medica	2015	Professional/specialist Society	Europe	Italy	H - High income	broad	multiple cancer	noSR
582	Eastern Canadian Colorectal Cancer Consensus Conference: standards of care for the treatment of patients with rectal, pancreatic, and gastrointestinal stromal tumours and pancreatic neuroendocrine tumours	ECCCCC	Eastern Canadian Colorectal Cancer Consensus Conference	2013	Independent Expert Panel	North America	Canada	H - High income	broad	multiple cancer	noSR
583	NCCN clinical practice guidelines in oncology: hepatobiliary cancers, version 1.2016	NCCN	National Comprehensive Cancer Network	2015	Professional/specialist Society	North America	USA	H - High income	broad	multiple cancer	noLA
584	Hepatocellular and biliary tract carcinomas: SEOM clinical guidelines	SEOM	Sociedad Española de Oncología Médica (Spanish Society of Medical Oncology)	2011	Professional/specialist Society	Europe	Spain	H - High income	broad	multiple cancer	noLA
585	ACG clinical guideline: the diagnosis and management of focal liver lesions.	ACG	American College of Gastroenterology	2014	Professional/specialist Society	North America	USA	H - High income	broad	multiple cancer	SR
586	ACR Appropriateness Criteria® suspected liver metastases.	ACR	American College of Radiology	2011	Professional/specialist Society	North America	USA	H - High income	focused	metastatic ab initio	SRinsDT
587	ACR Appropriateness Criteria radiologic management of hepatic malignancy.	ACR	American College of Radiology	2011	Professional/specialist Society	North America	USA	H - High income	focused	metastatic ab initio	SRinsDT
588	ACR Appropriateness Criteria® screening for pulmonary metastases.	ACR	American College of Radiology	2013	Professional/specialist Society	North America	USA	H - High income	focused	metastatic ab initio	SRinsDT
589	Gynaecological cancer guidelines	NHMRC (GMCT-ACI)	National Health and Medical Research Council (Greater Metropolitan Clinical Taskforce-Agency for Clinical Innovation)	2009	Government Agency	Oceania	Australia	H - High income	broad	multiple cancer	noLA
590	ACR Appropriateness Criteria® jaundice.	ACR	American College of Radiology	2012	Professional/specialist Society	North America	USA	H - High income	focused	multiple cancer	SRinsDT
591	Malignant disease in the haemophilic population: moving towards a management consensus?	cwg	consensus working group	2012	Independent Expert Panel	Europe	Europe	H - High income	focused	multiple cancer	noSR
592	Comprehensive Cervical Cancer Control: A Guide to Essential Practice.	WHO	World Health Organization	2014	other	international	international (WHO)	H - High income	broad	cervical cancer	SRnoDT
